# Supplementary material for: Neuroprotective Norsesquiterpenoids and Triterpenoids from Populus euphratica Resins
Source: PubMed Central journal article supplement (PMC6930471; doi:10.3390/molecules24234379), 2019-11-30
Supplement: molecules-24-04379-s001.pdf [file molecules-24-04379-s001.pdf]

# Supplementary Materials

## Neuroprotective Norsesquiterpenoids and Triterpenoids from *Populus euphratica* Resins

Yun-Yun Liu <sup>1,2†</sup>, Dan-Ling Huang <sup>1†</sup>, Yun Dong <sup>1</sup>, Da-Peng Qin <sup>1</sup>, Yong-Ming Yan <sup>1</sup> and  
Yong-Xian Cheng <sup>1,\*</sup>

1 School of Pharmaceutical Sciences, Shenzhen University Health Science Center, Shenzhen 518060, China; [leonchemistry@szu.edu.cn](mailto:leonchemistry@szu.edu.cn) (D.-L.H.); [yundong@szu.edu.cn](mailto:yundong@szu.edu.cn) (Y.D.); [tqindp@szu.edu.cn](mailto:tqindp@szu.edu.cn) (D.-P.Q.); [yanyym@szu.edu.cn](mailto:yanyym@szu.edu.cn) (Y.-M.Y);

2 Shanxi University of Chinese Medicine, Jinzhong 030619, China; [liuyunyun2017@foxmail.com](mailto:liuyunyun2017@foxmail.com) (Y.-Y.L.);

\* Correspondence: [yxcheng@szu.edu.cn](mailto:yxcheng@szu.edu.cn); Tel.: +86-0755-26902073;

† These authors contributed equally to this work.

## **Table of Contents**

- 1. Figures S1–S15 NMR spectra and HRESIMS of 1**
- 2. Figures S16–S24 NMR spectra and HRESIMS of 2**
- 3. Figures S25–S32 NMR spectra and HRESIMS of 3**
- 4. Figures S33–S40 NMR spectra and HRESIMS of 4**
- 5. Figures S41–S43 NMR spectra of 4a**
- 6. Figures S44–S46 NMR spectra of 4b**
- 7. Figure S47. The lowest energy conformers of 1**
- 8. Figure S48. The lowest energy conformers of 2**
- 9. Figure S49. The lowest energy conformers of 3**
- 10. Figure S50. The lowest energy conformers of 4**
- 11. Table S1. Extracted heats and weighting factors of the optimized conformers of 1–4**
- 12. Table S2. The Cartesian coordinates of the lowest energy conformers for 1–4**

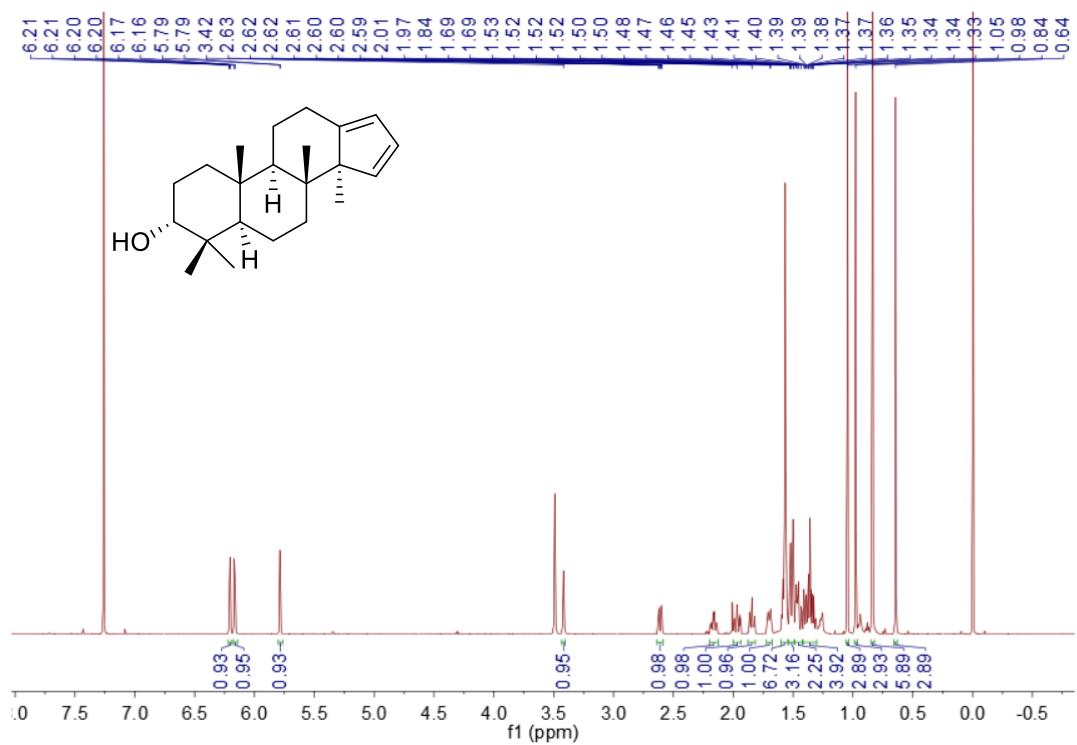

Figure S1.  $^1\text{H}$  NMR spectrum of **1** in  $\text{CDCl}_3$ .

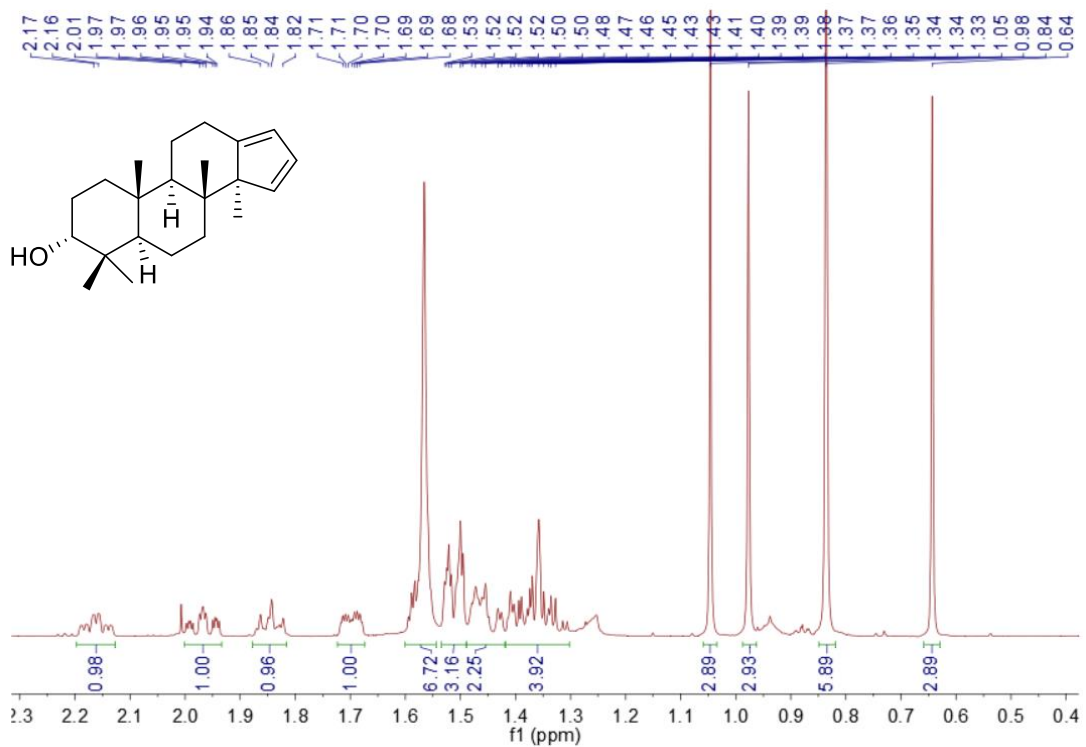

Figure S2. Enlarged  $^1\text{H}$  NMR spectrum of **1** in  $\text{CDCl}_3$ .

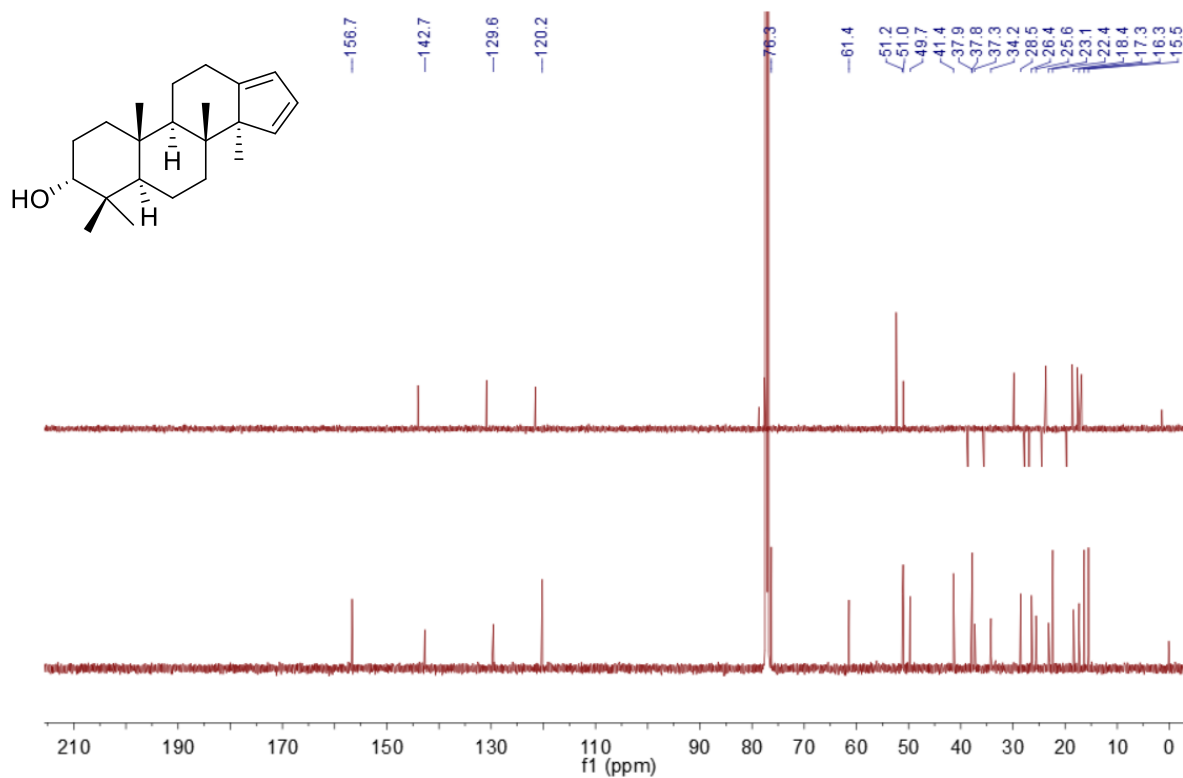

**Figure S3.**  $^{13}\text{C}$  NMR and DEPT spectra of **1** in  $\text{CDCl}_3$ .

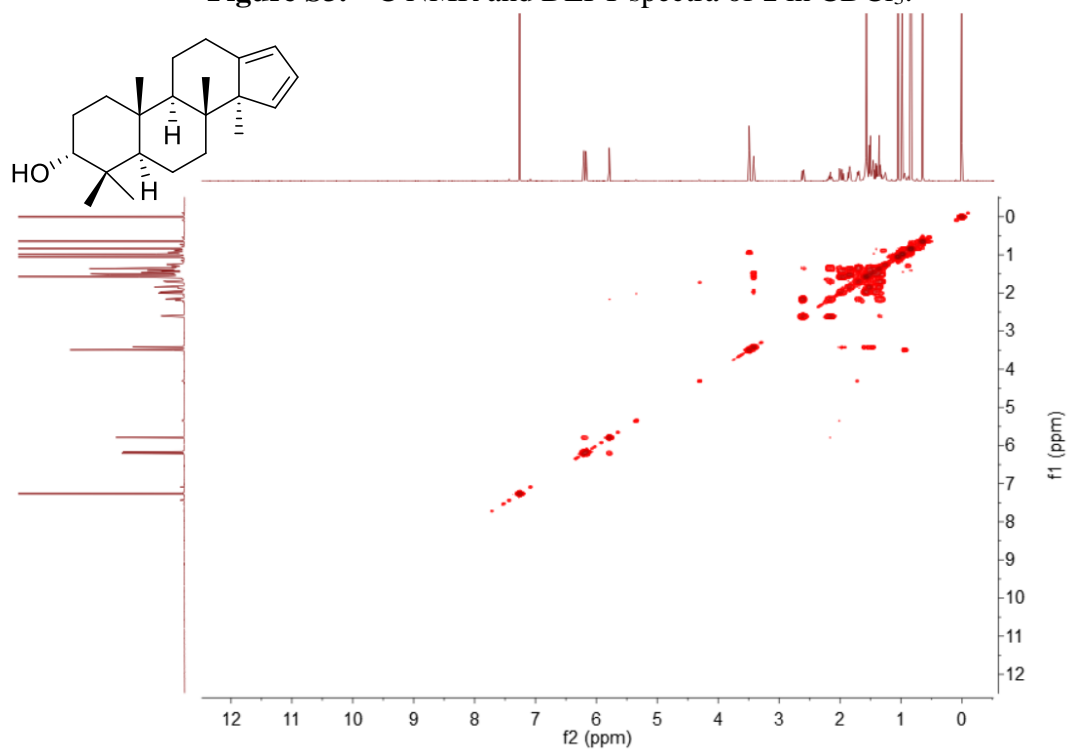

**Figure S4.**  $^1\text{H}$ - $^1\text{H}$  COSY spectrum of **1** in  $\text{CDCl}_3$ .

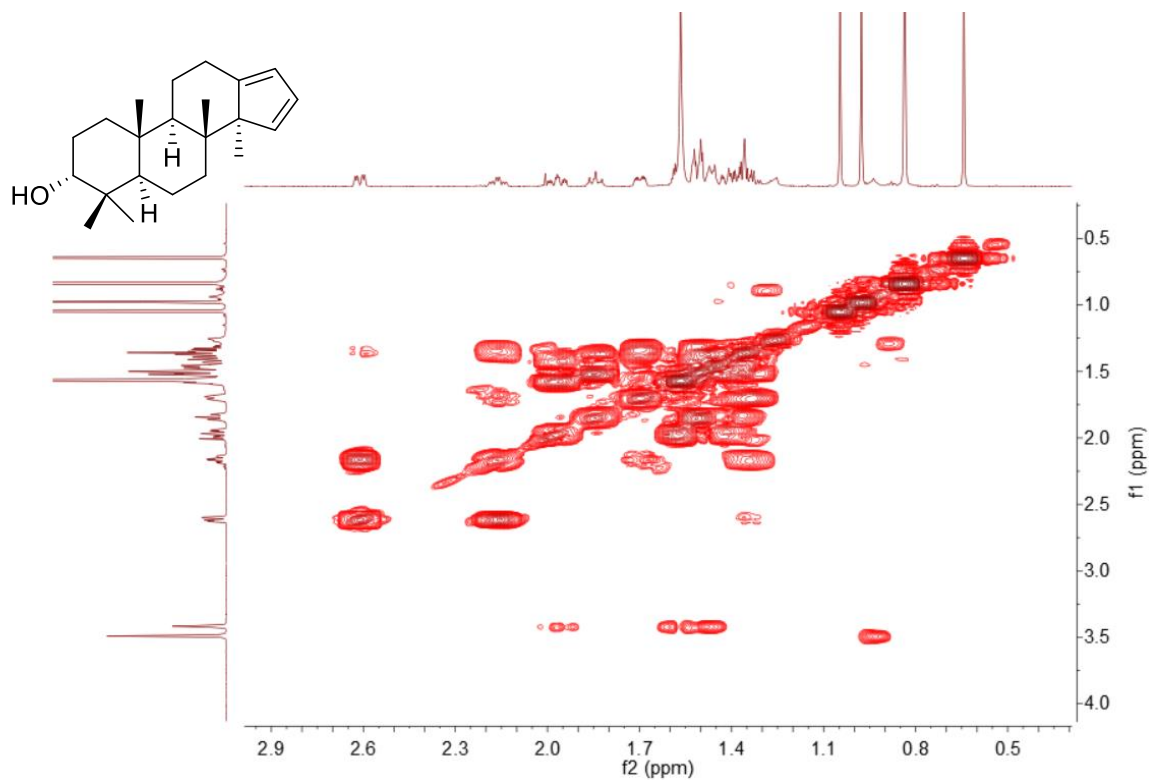

**Figure S5.** Enlarged  $^1\text{H}$ - $^1\text{H}$  COSY spectrum of **1** in  $\text{CDCl}_3$ .

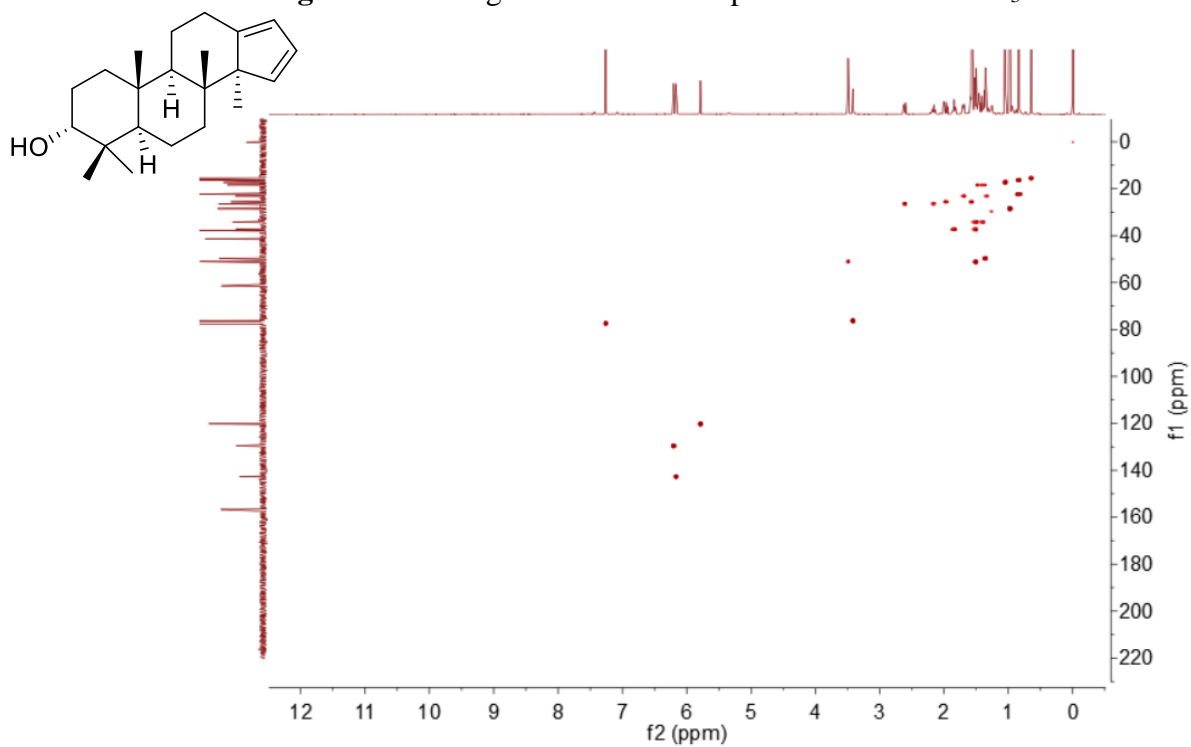

**Figure S6.** HSQC spectrum of **1** in  $\text{CDCl}_3$ .

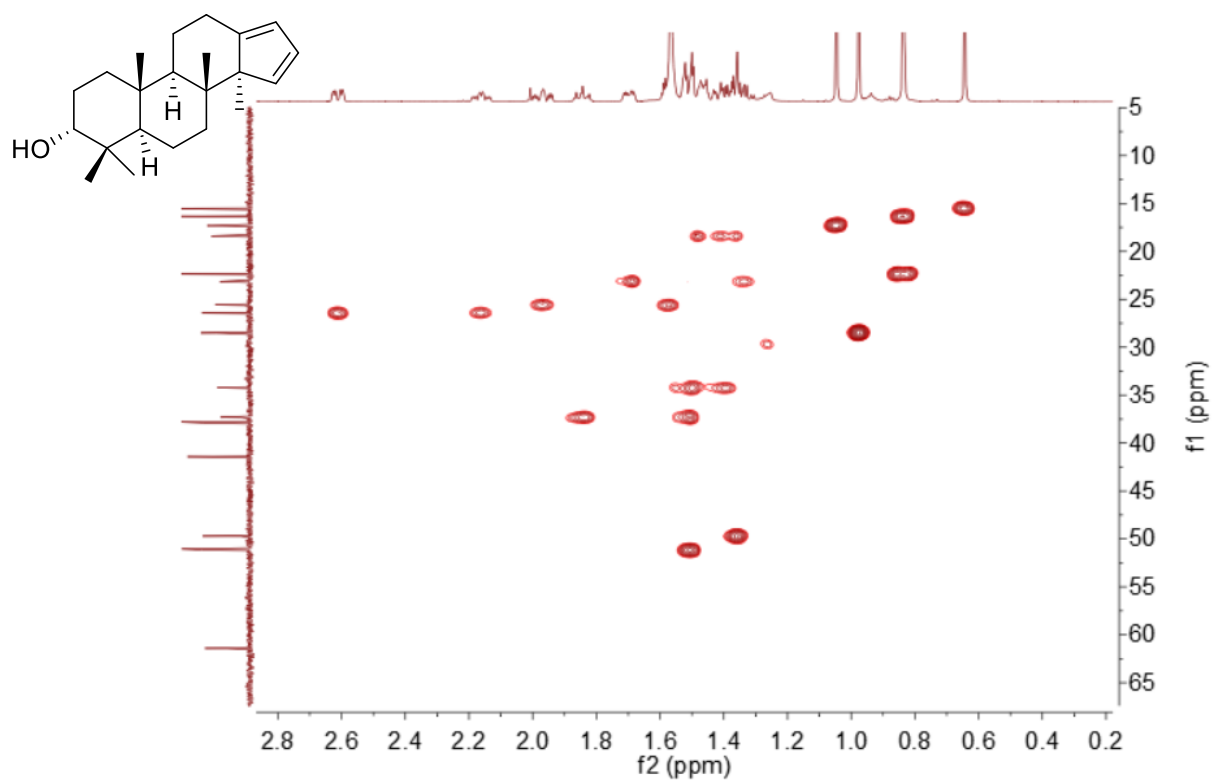

**Figure S7.** Enlarged HSQC spectrum of **1** in CDCl<sub>3</sub>.

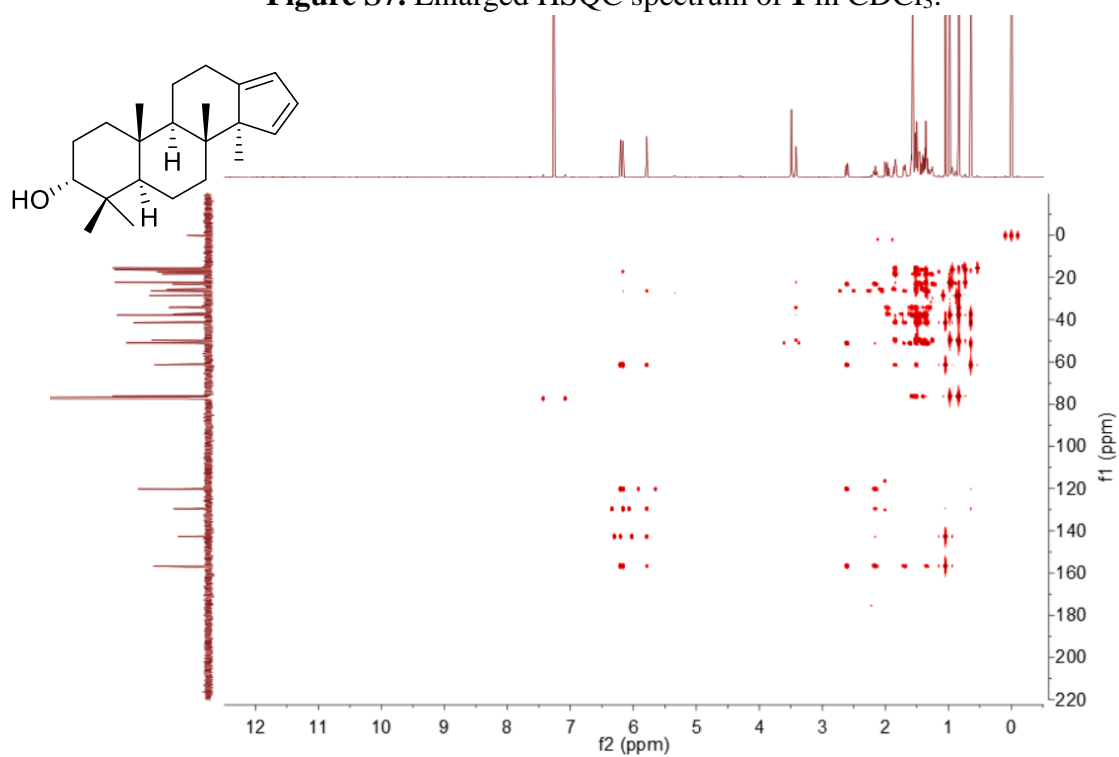

**Figure S8.** HMBC spectrum of **1** in CDCl<sub>3</sub>.

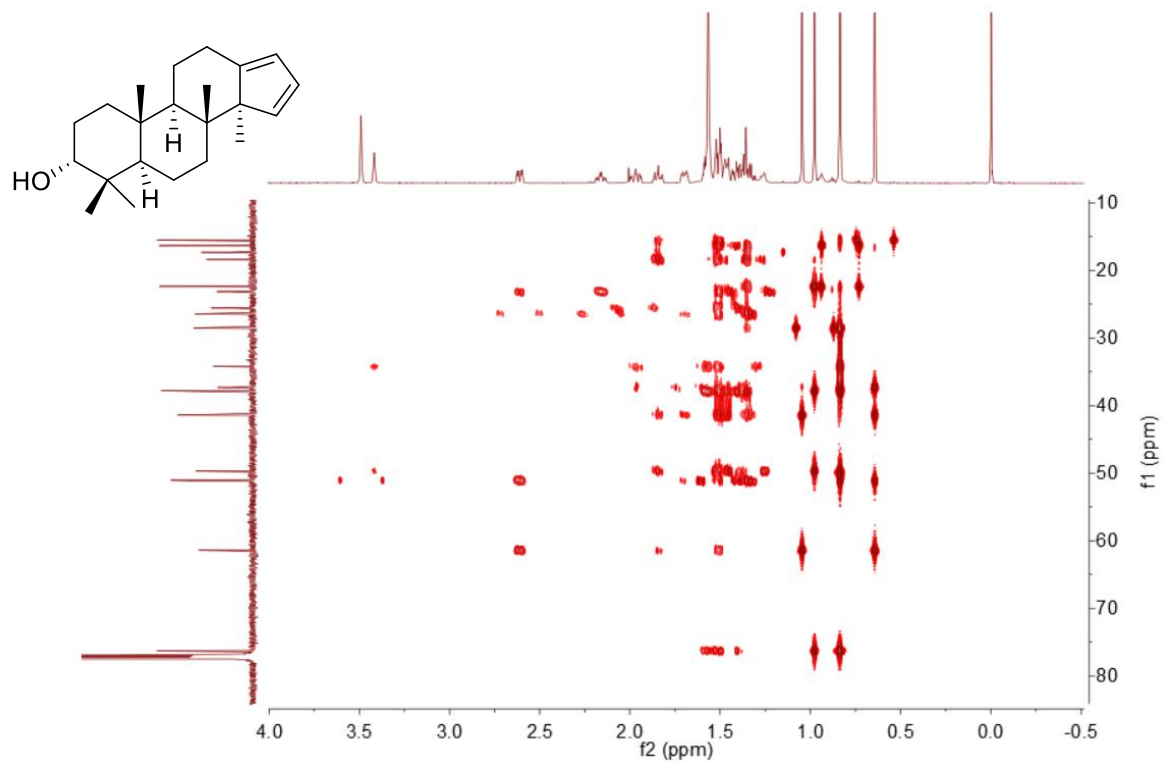

**Figure S9.** Enlarged HMBC spectrum of **1** in  $\text{CDCl}_3$ .

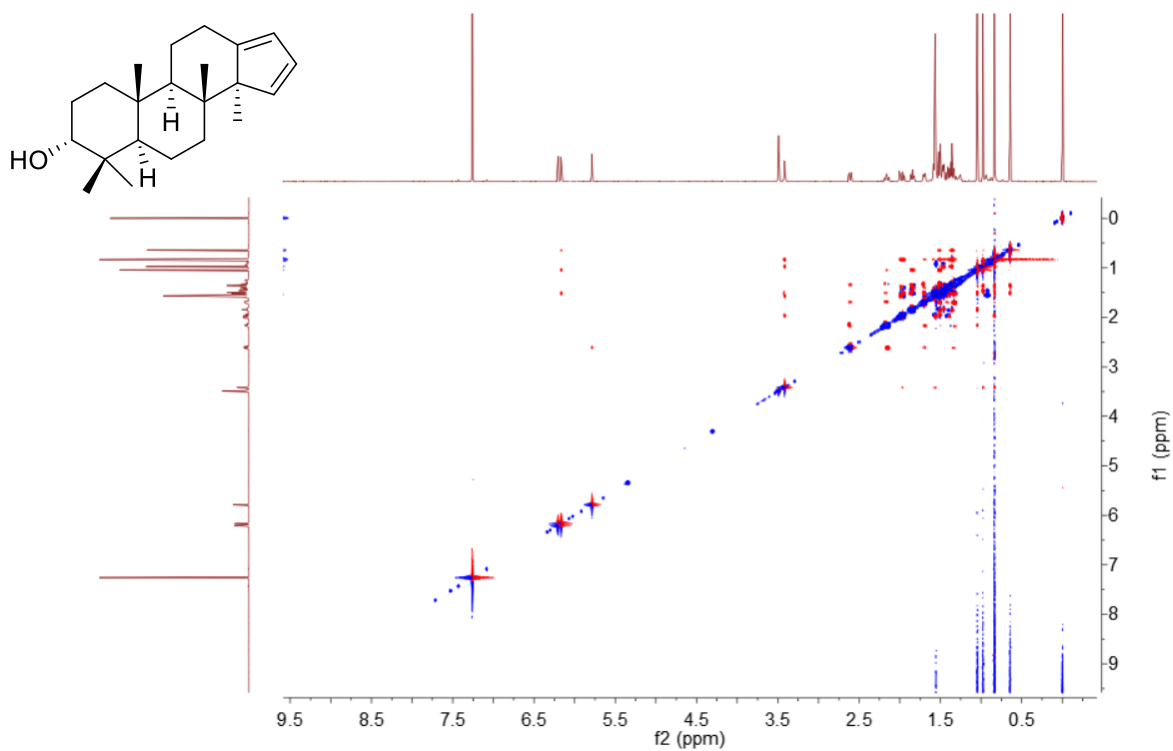

**Figure S10.** ROESY spectrum of **1** in  $\text{CDCl}_3$ .

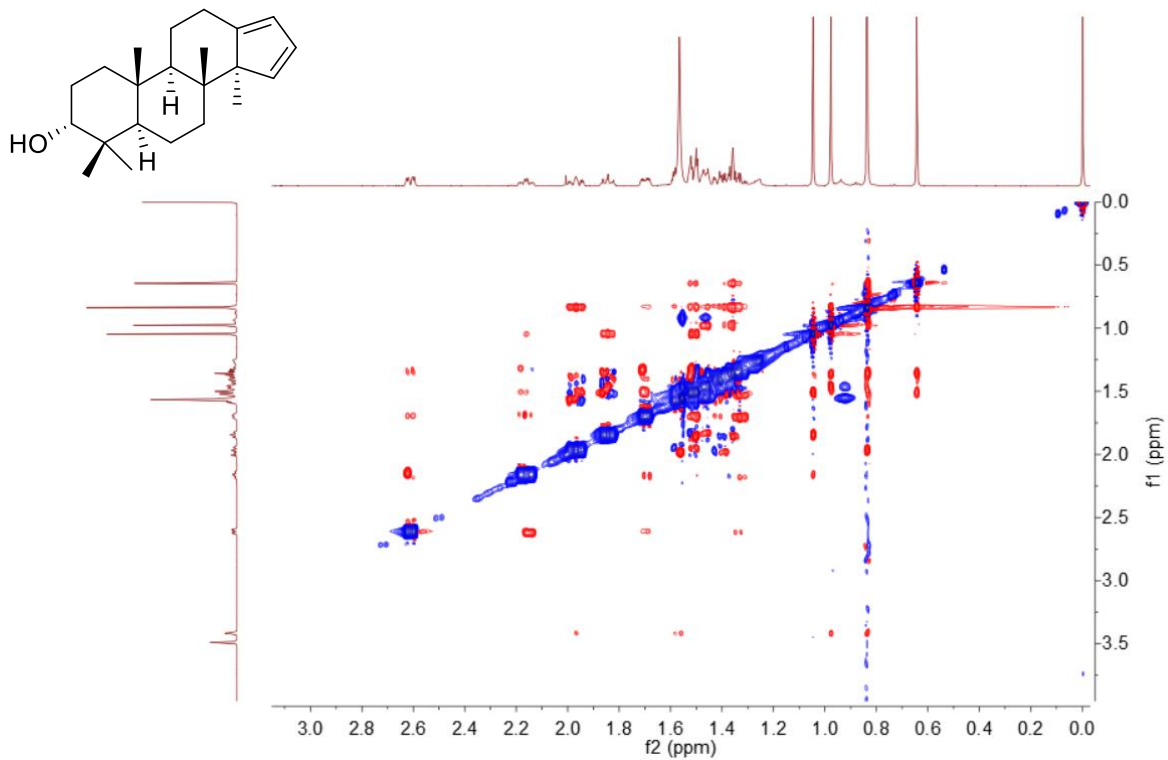

**Figure S11.** Enlarged ROESY spectrum of **1** in  $\text{CDCl}_3$ .

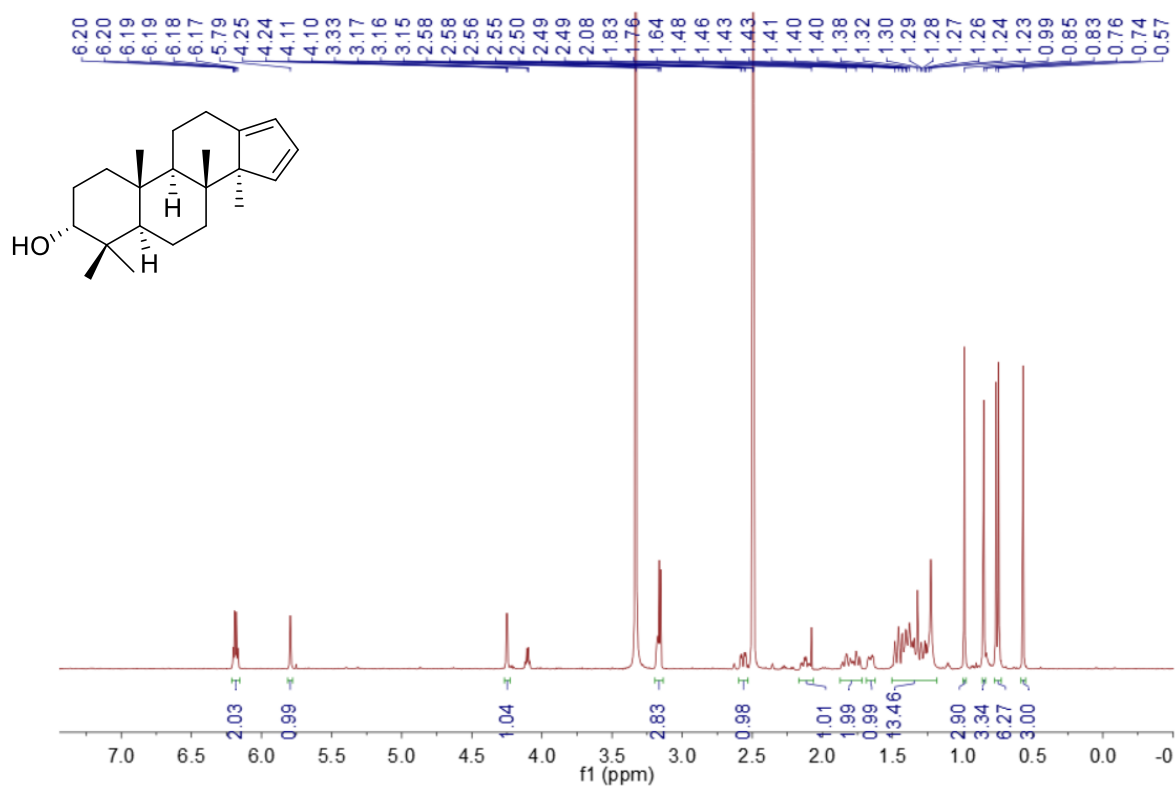

**Figure S12.**  $^1\text{H}$  NMR spectrum of **1** in  $\text{DMSO}-d_6$ .



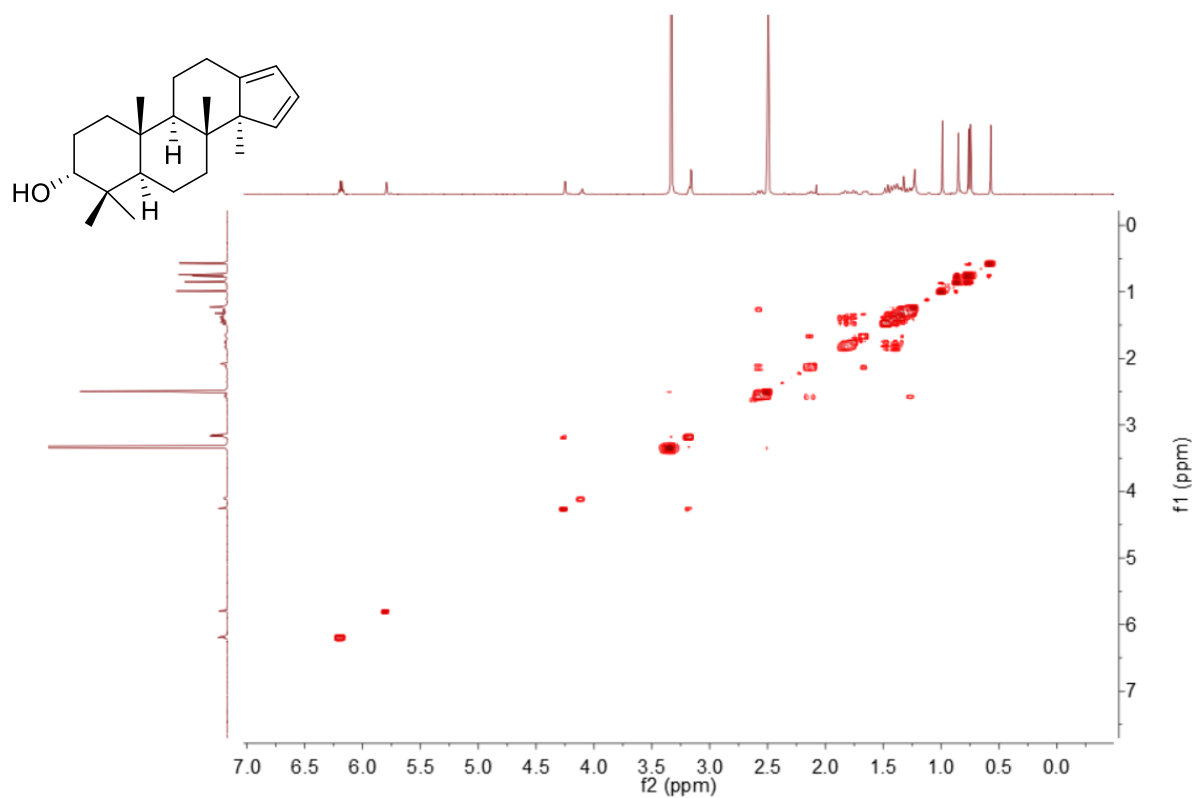

**Figure S13.**  $^1\text{H}$ - $^1\text{H}$  COSY spectrum of **1** in  $\text{DMSO-}d_6$ .

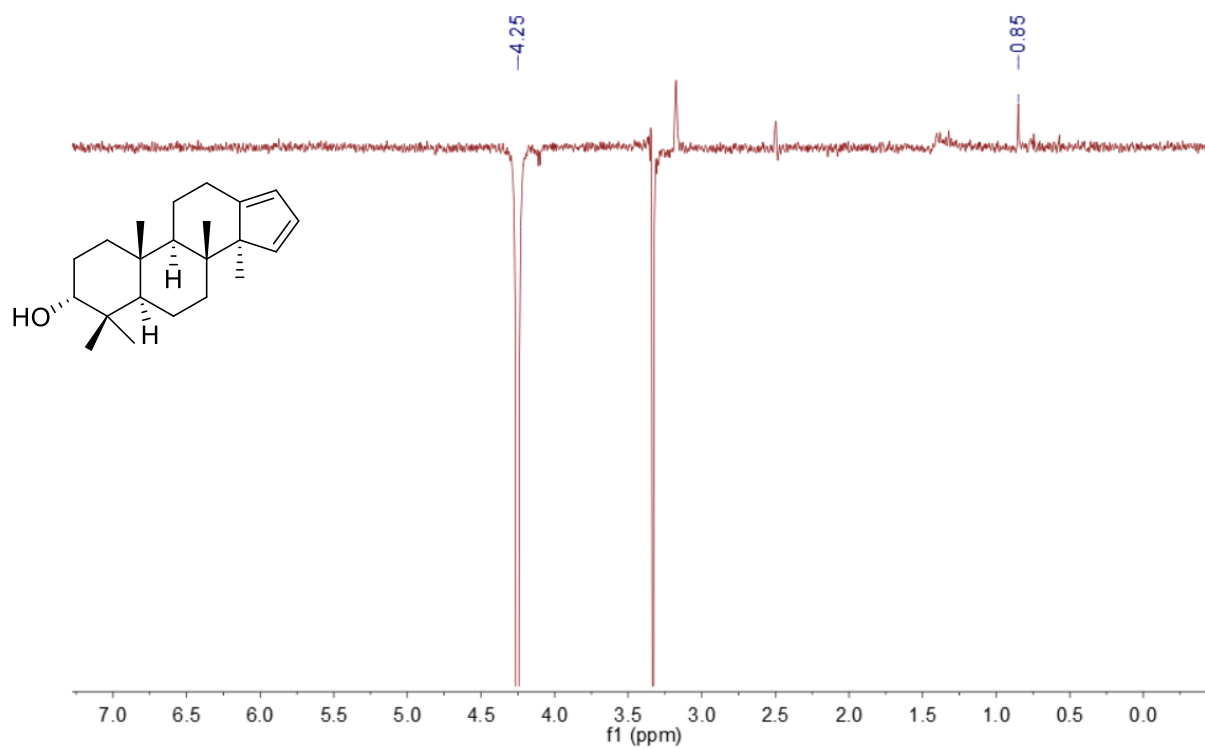

**Figure S14.** NOE spectrum of **1** in  $\text{DMSO-}d_6$ .

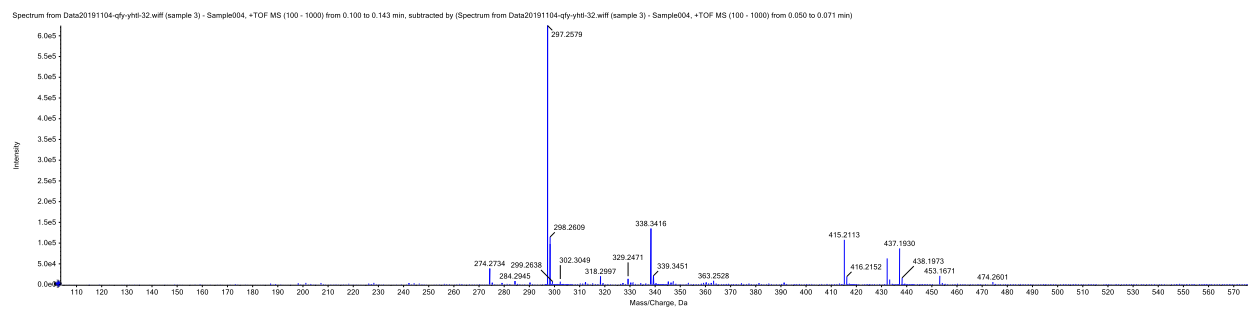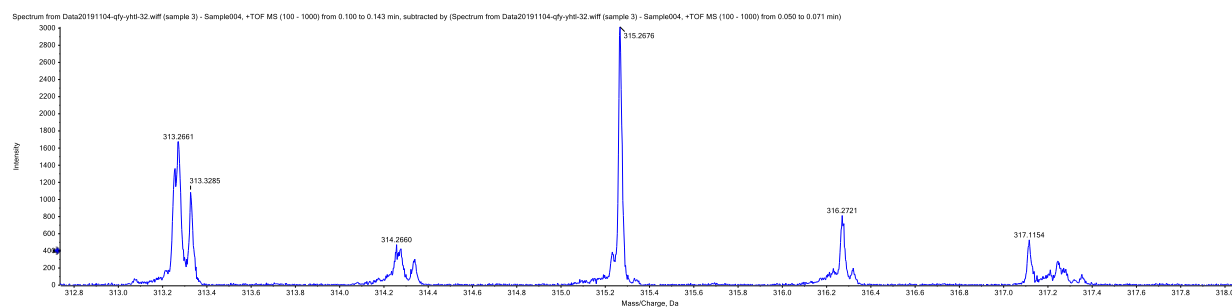

$[M+H]^+$  m/z 315.2676

| Hit | Formula                           | m/z      | RDB | ppm  |
|-----|-----------------------------------|----------|-----|------|
| 1   | C <sub>22</sub> H <sub>34</sub> O | 315.2682 | 6.0 | -2.0 |

Elements from ~ to C<sub>22</sub>H<sub>34</sub>O

Mass tolerance 5 ppm

**Figure S15.** HRESIMS of **1**.

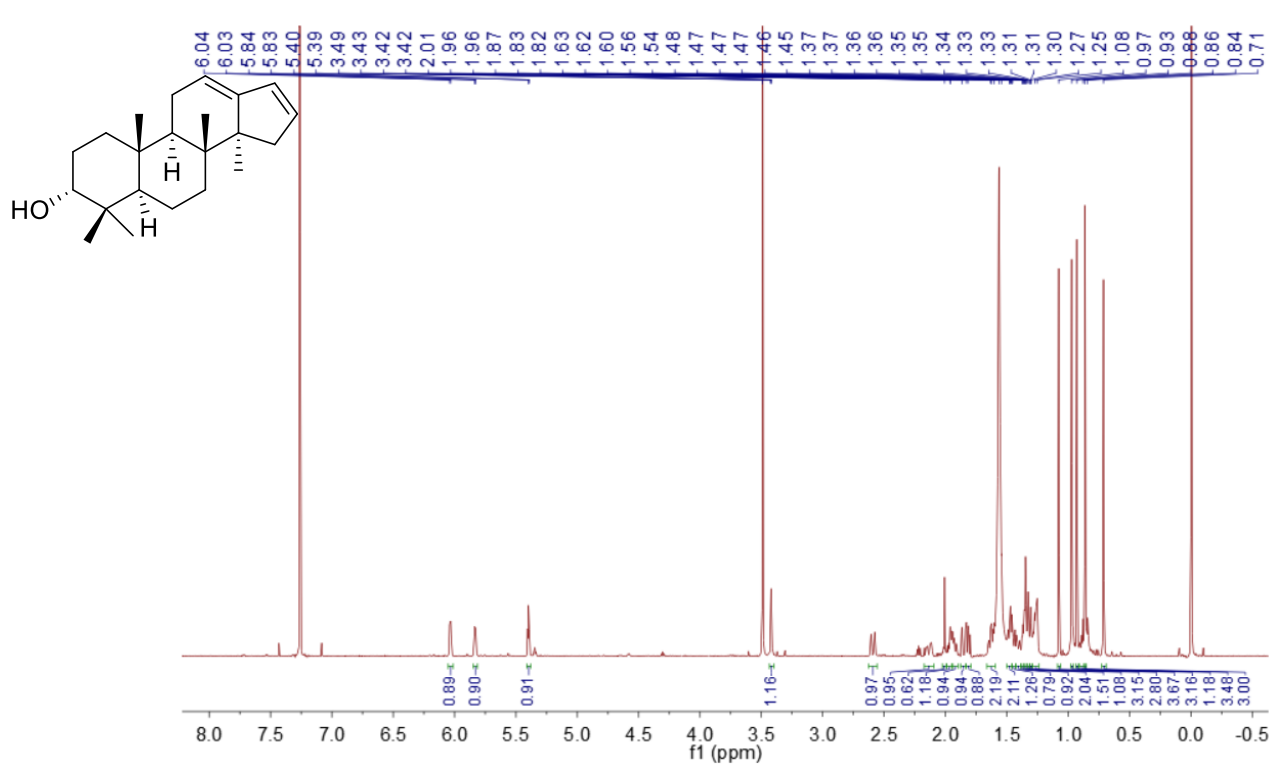

**Figure S16.** <sup>1</sup>H NMR spectrum of **2** in CDCl<sub>3</sub>.

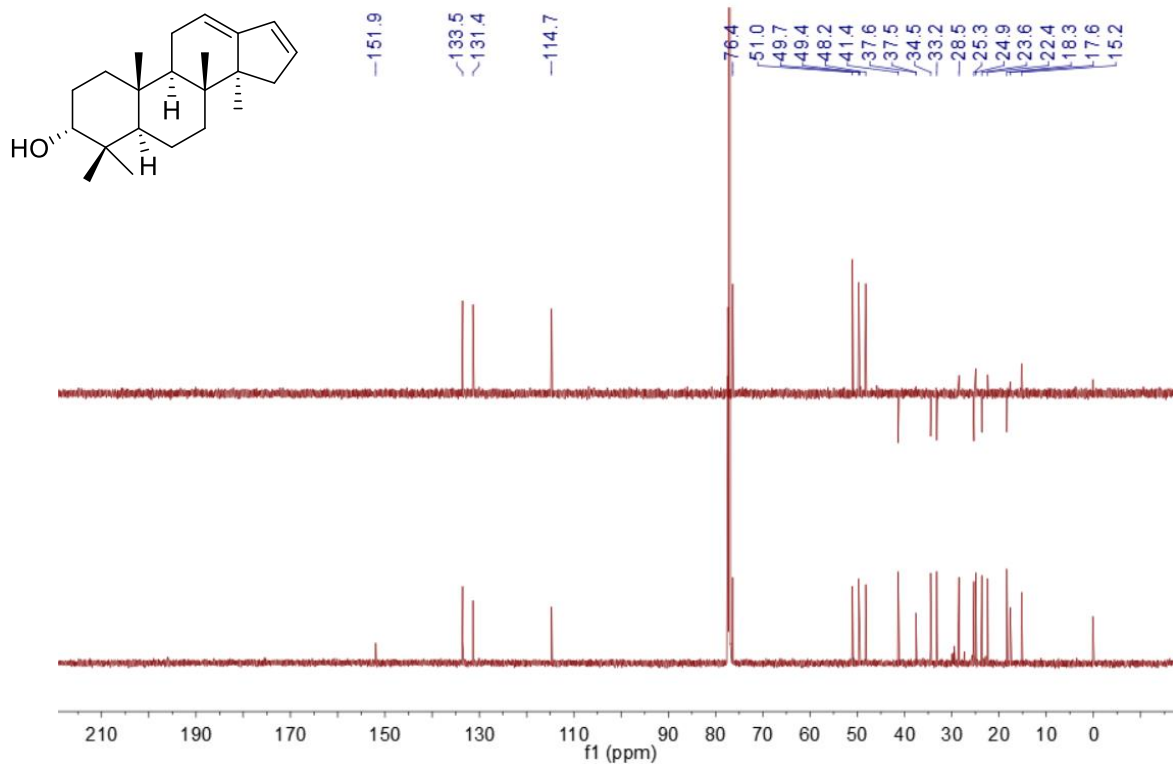

**Figure S17.**  $^{13}\text{C}$  NMR and DEPT spectra of **2** in  $\text{CDCl}_3$ .

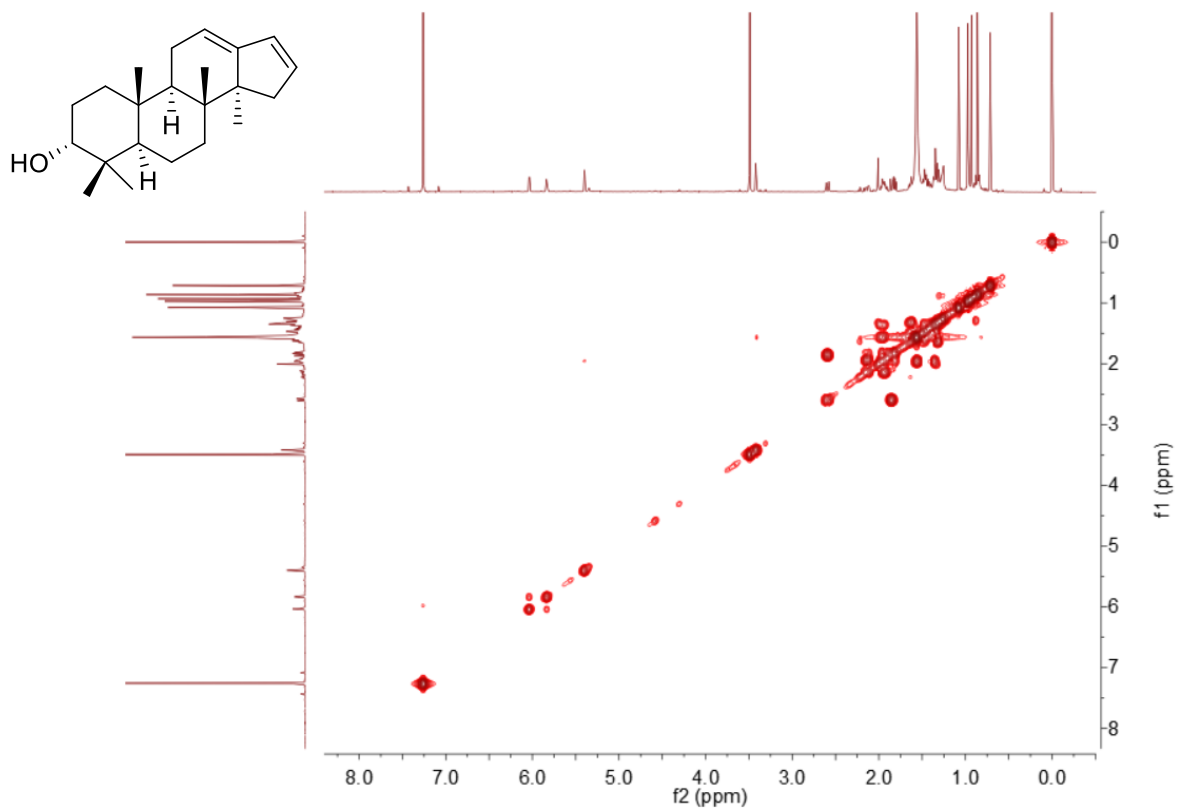

**Figure S18.**  $^1\text{H}$ - $^1\text{H}$  COSY spectrum of **2** in  $\text{CDCl}_3$ .

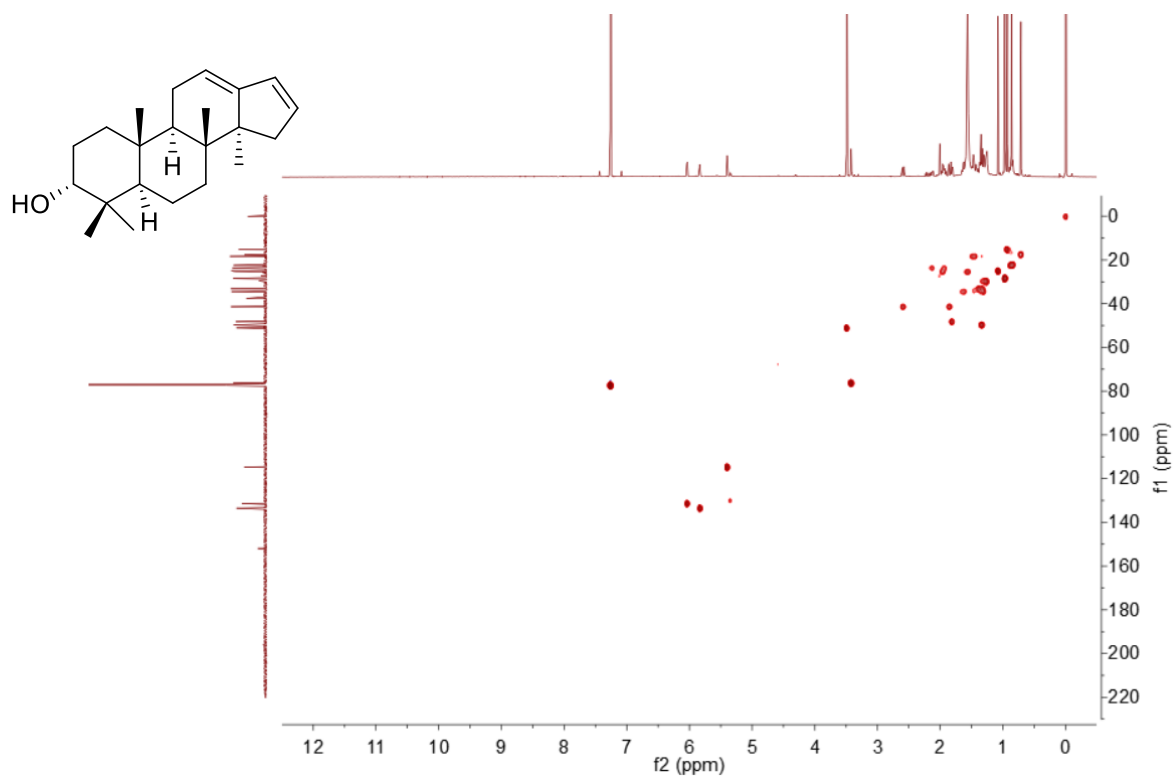

**Figure S19.** HSQC spectrum of **2** in CDCl<sub>3</sub>.

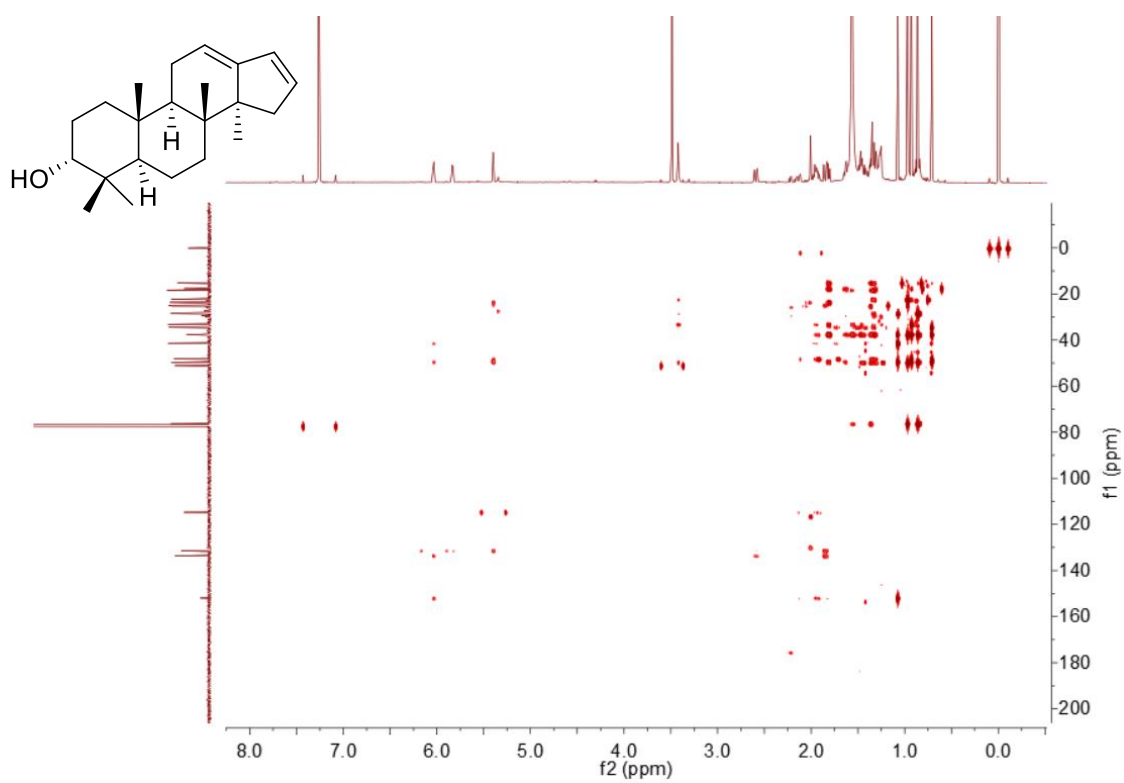

**Figure S20.** HMBC spectrum of **2** in CDCl<sub>3</sub>.

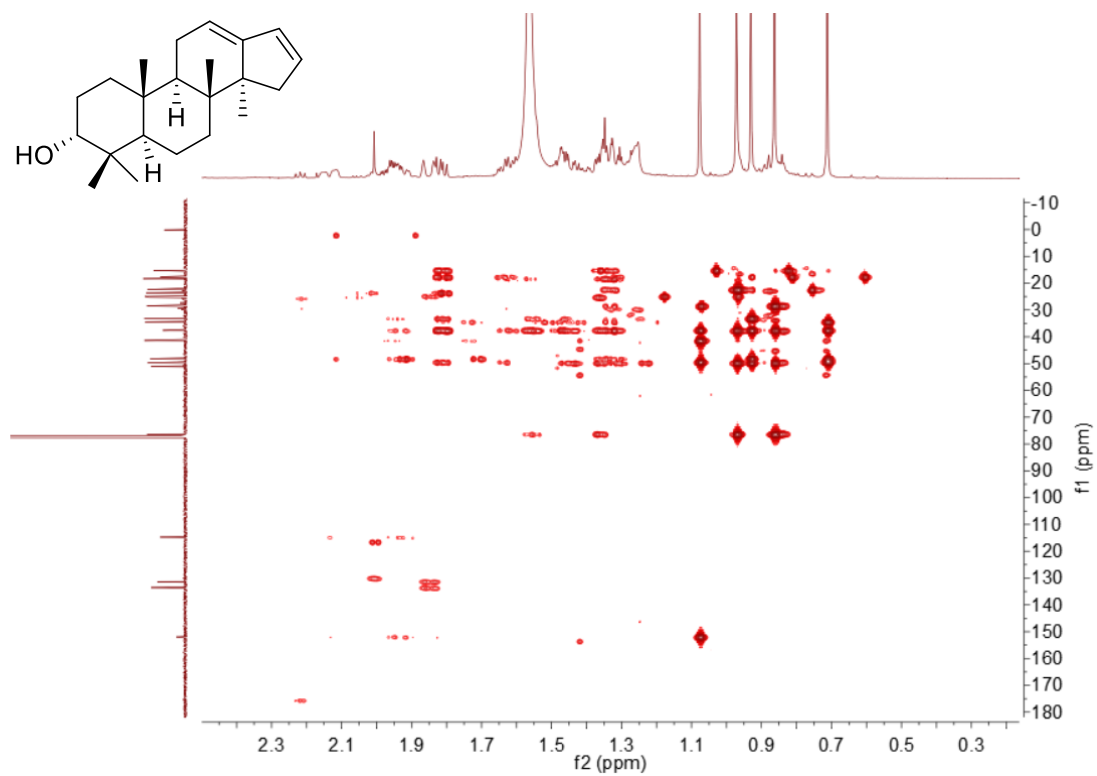

**Figure S21.** Enlarged HMBC spectrum of **2** in CDCl<sub>3</sub>.

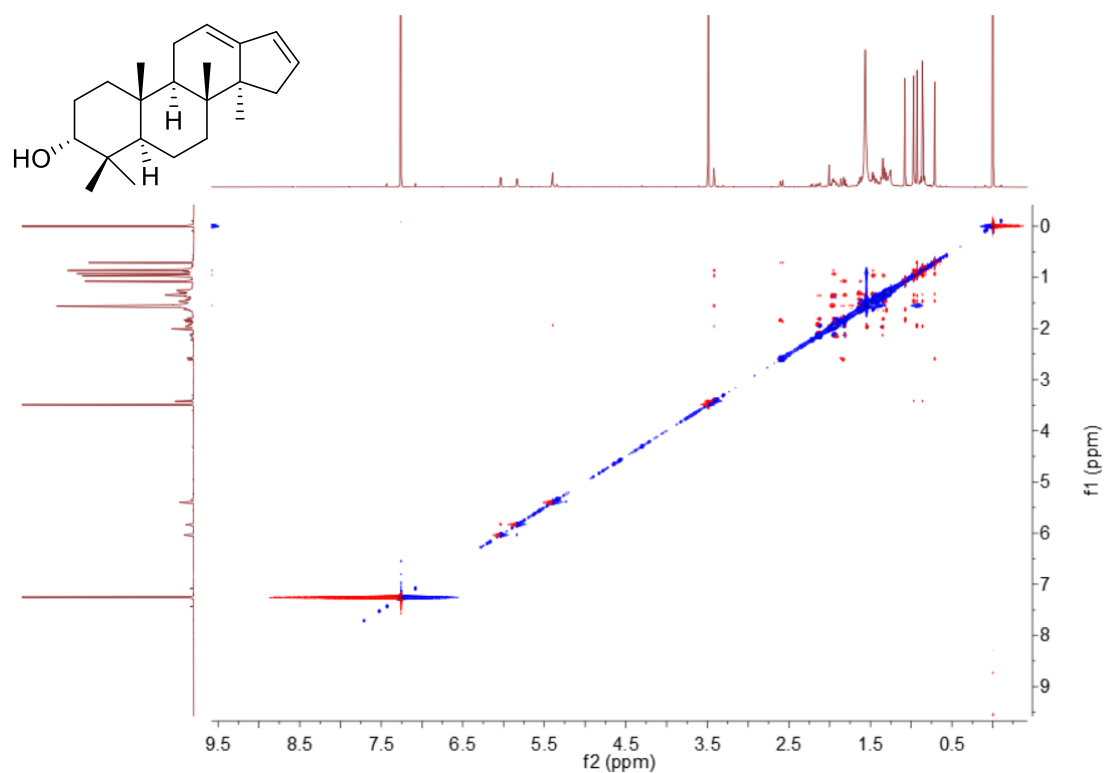

**Figure S22.** ROESY spectrum of **2** in CDCl<sub>3</sub>.

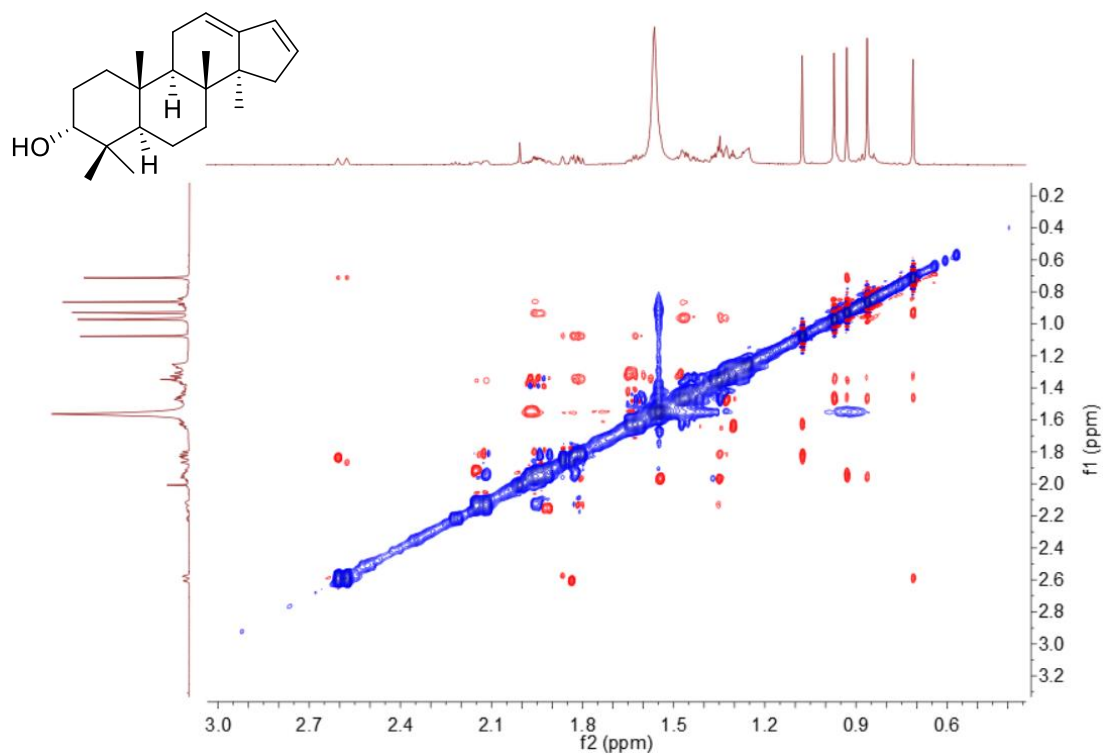

**Figure S23.** Enlarged ROESY spectrum of **2** in  $\text{CDCl}_3$ .

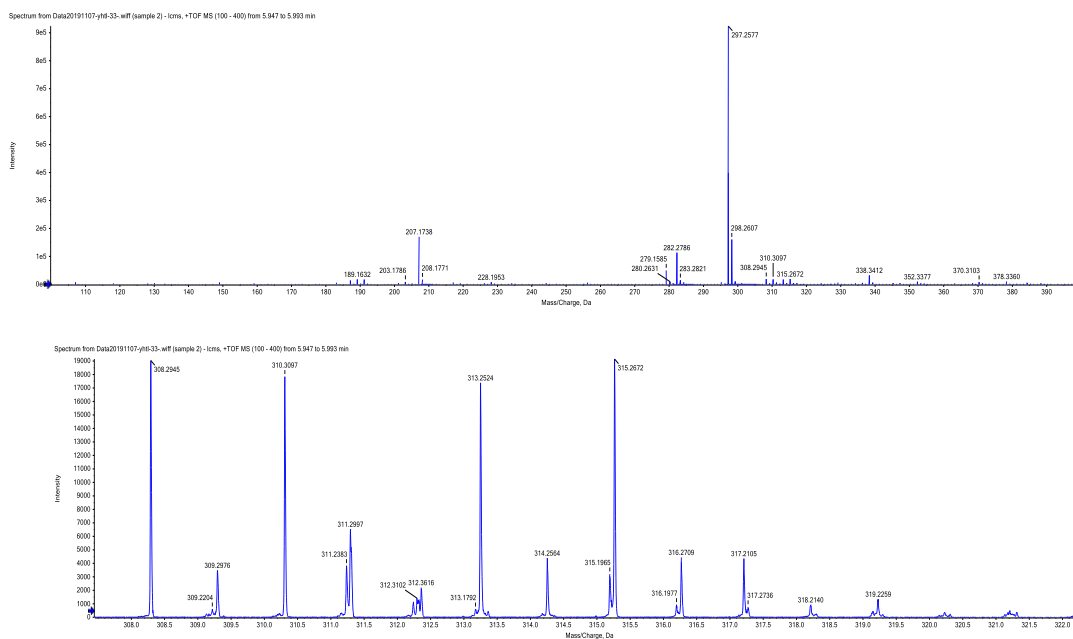

$[\text{M}+\text{H}]^+$   $m/z$  315.2672

| Hit | Formula                              | $m/z$    | RDB | ppm  |
|-----|--------------------------------------|----------|-----|------|
| 1   | $\text{C}_{22}\text{H}_{34}\text{O}$ | 315.2682 | 6.0 | -3.3 |

Elements from ~ to  $\text{C}_{22}\text{H}_{34}\text{O}$

Mass tolerance 5 ppm

**Figure S24.** HRESIMS of **2**.

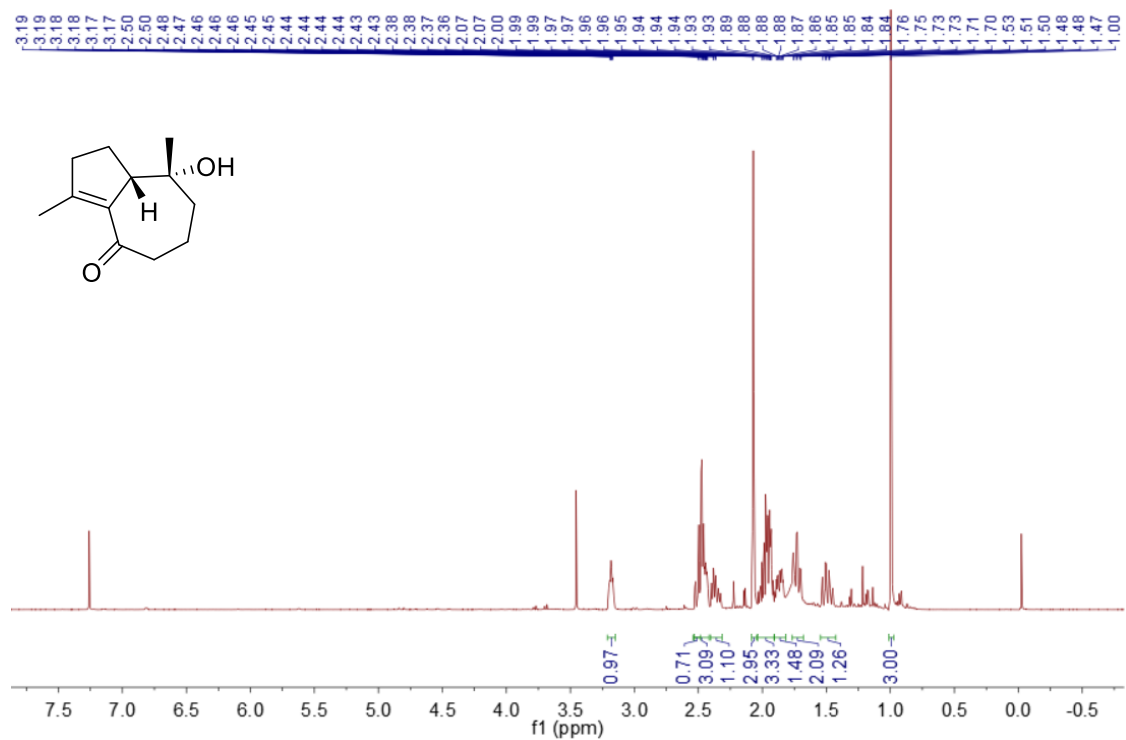

**Figure S25.** <sup>1</sup>H NMR spectrum of **3** in CDCl<sub>3</sub>.

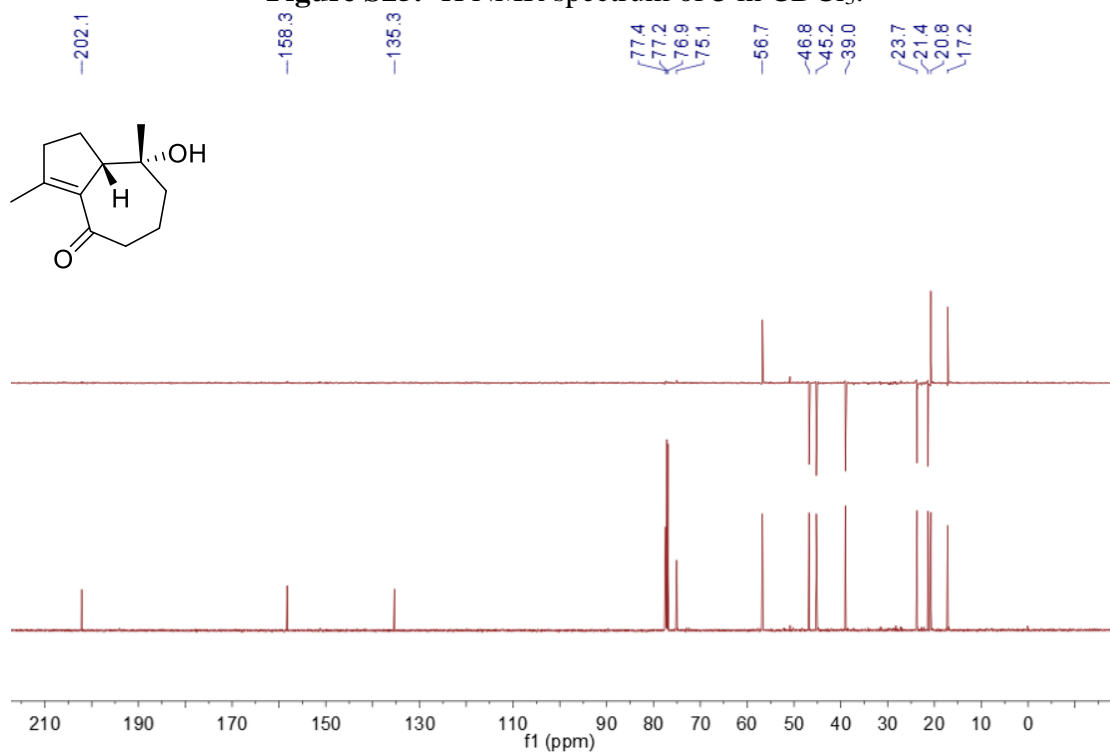

**Figure S26.** <sup>13</sup>C NMR and DEPT spectra of **3** in CDCl<sub>3</sub>.

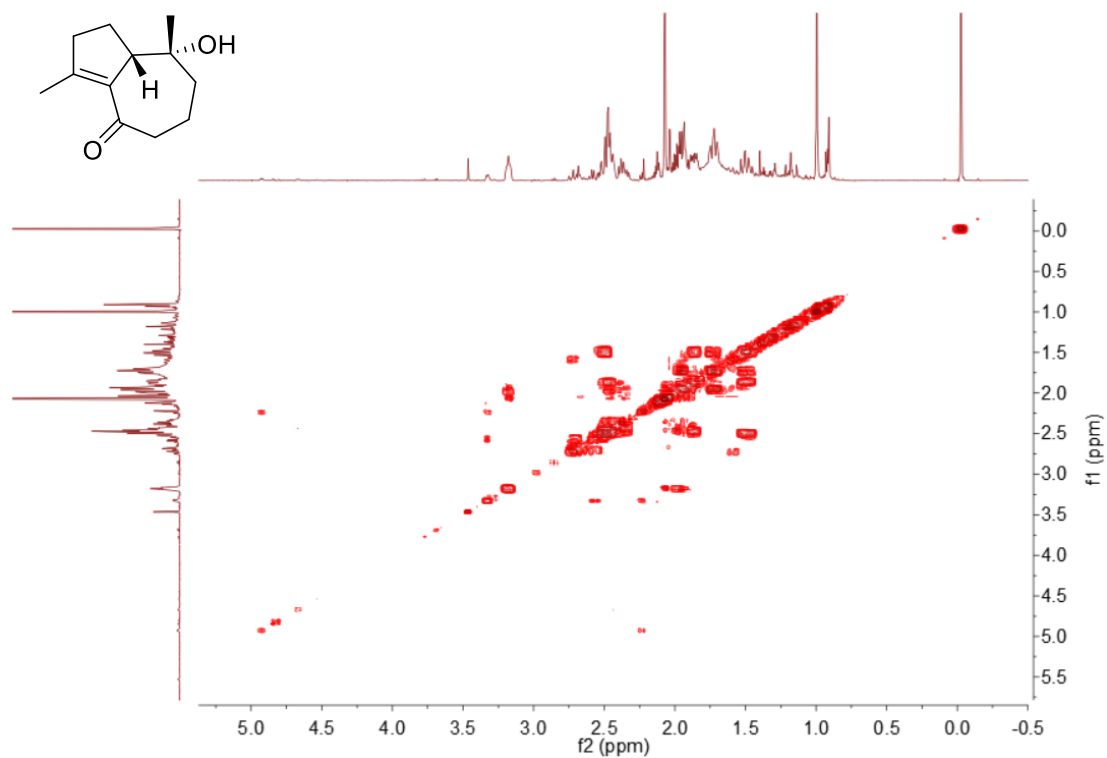

**Figure S27.**  $^1\text{H}$ - $^1\text{H}$  COSY spectra of **3** in  $\text{CDCl}_3$ .

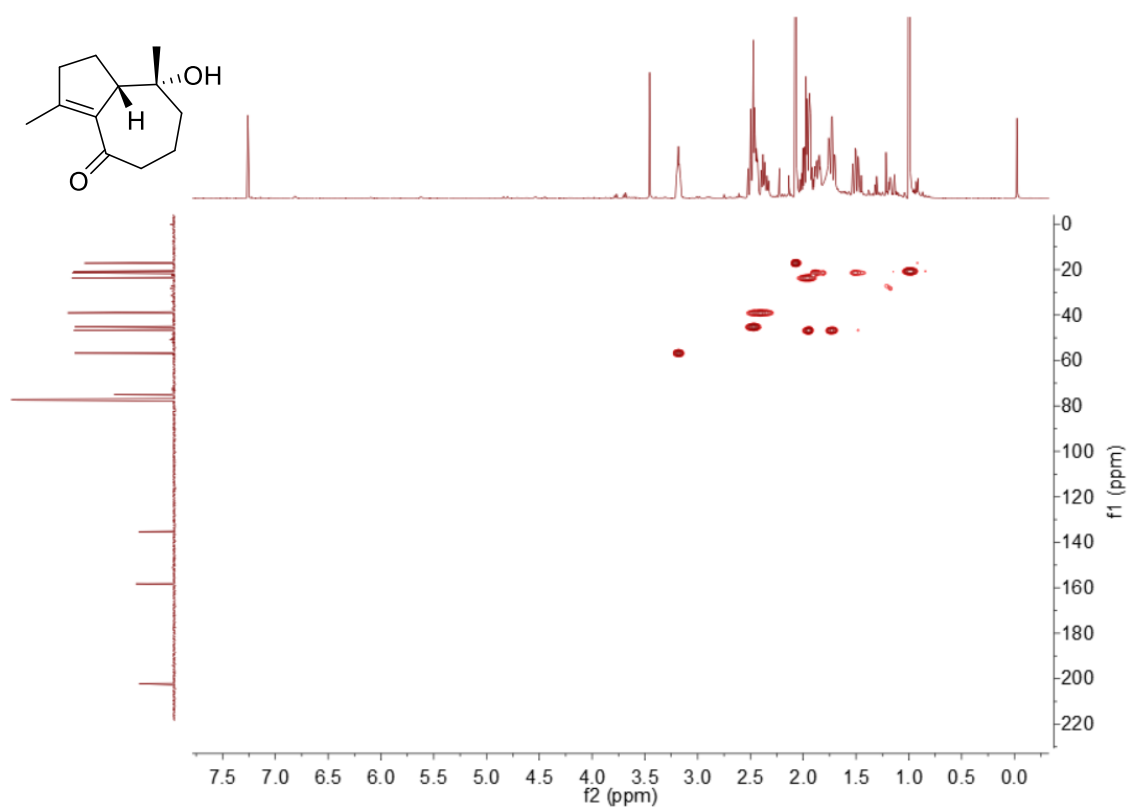

**Figure S28.** HSQC spectrum of **3** in  $\text{CDCl}_3$ .



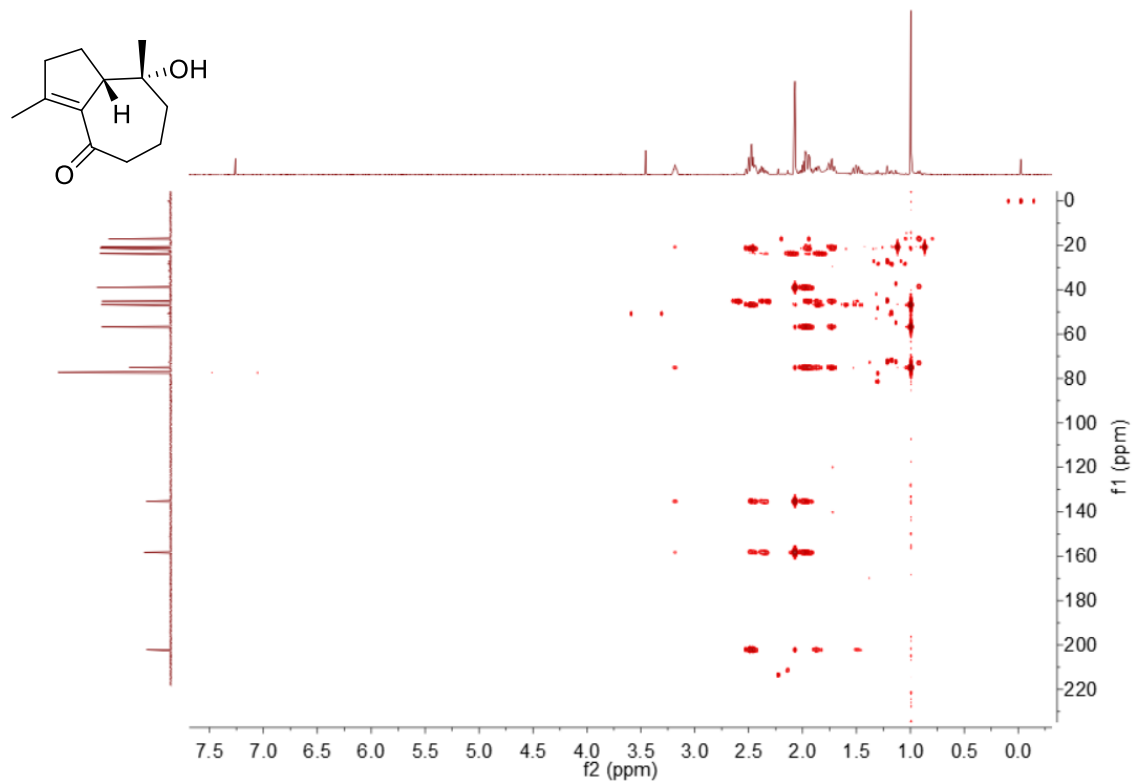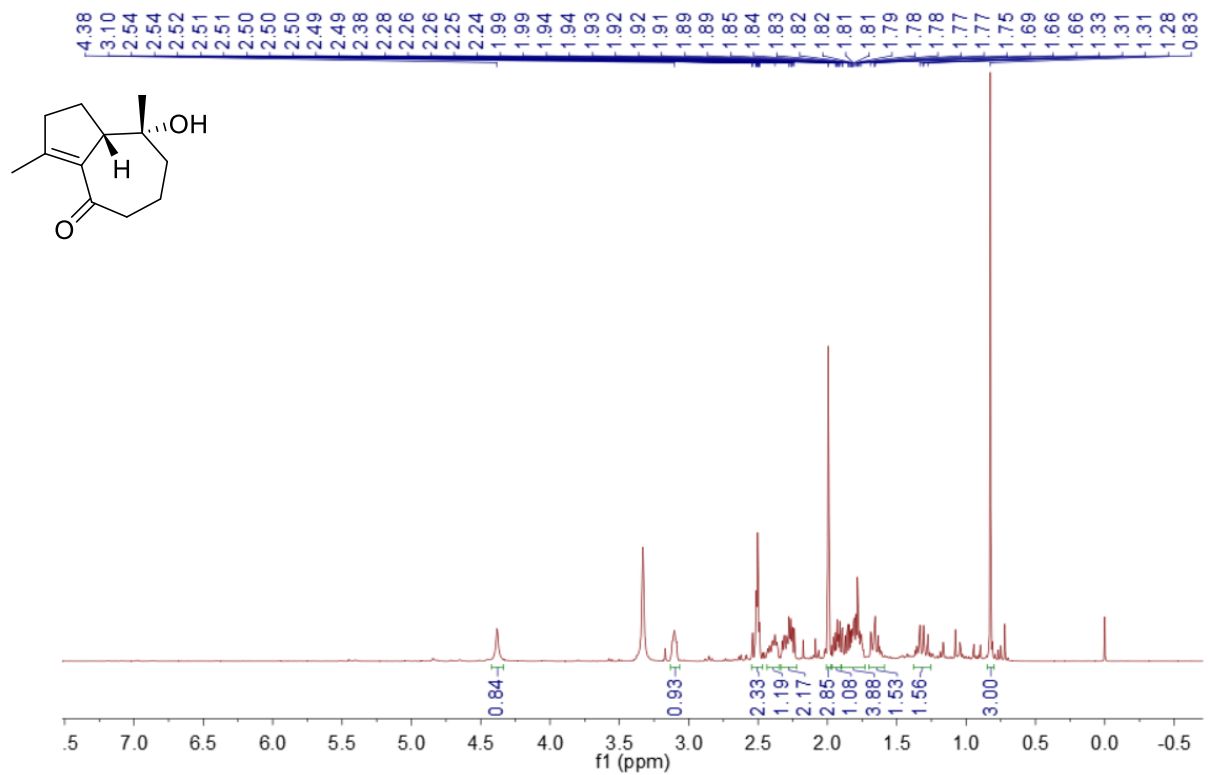

Figure S30. <sup>1</sup>H NMR spectrum of 3 in DMSO-*d*<sub>6</sub>.

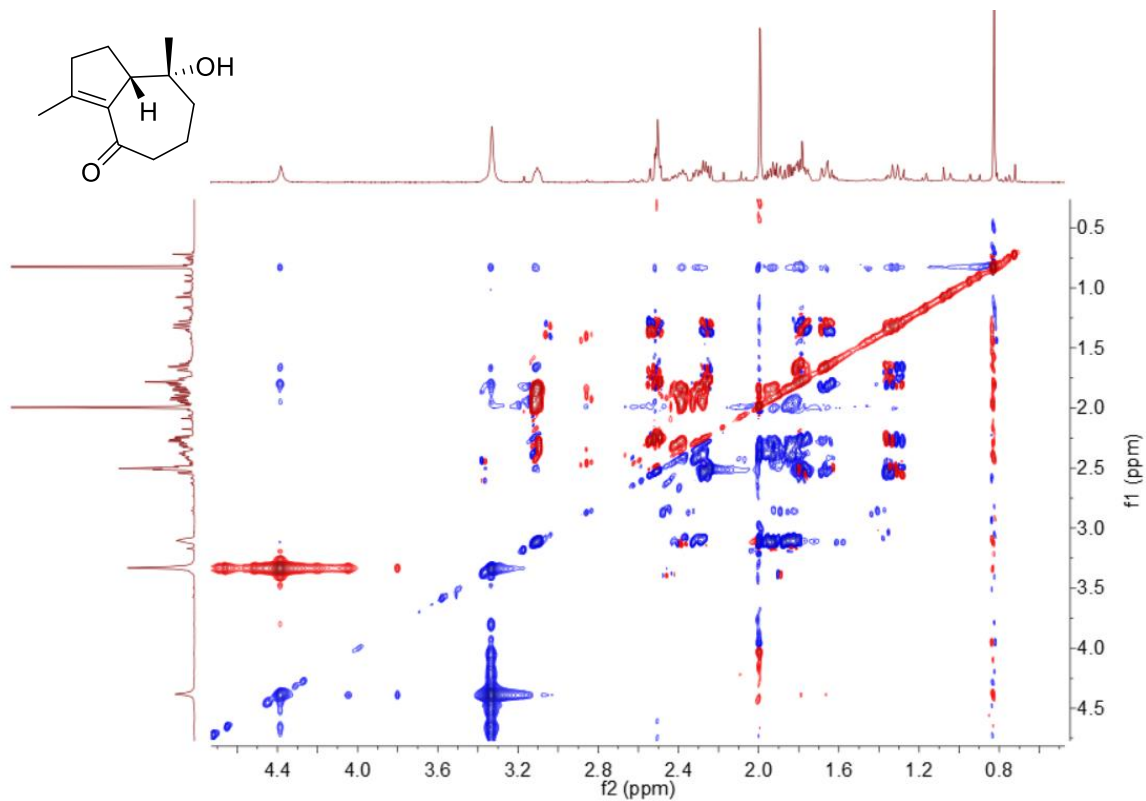

**Figure S31.** ROESY spectrum of **3** in DMSO- $d_6$ .

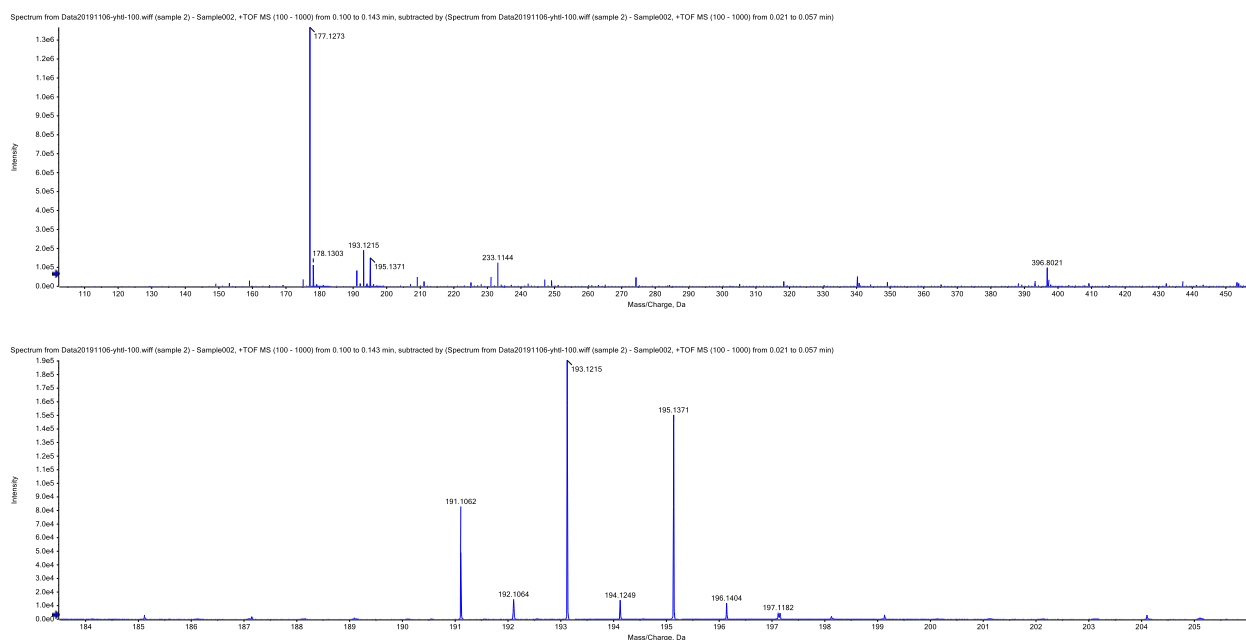

$[M+H]^+$   $m/z$  195.1371

| Hit | Formula                                        | $m/z$    | RDB | ppm  |
|-----|------------------------------------------------|----------|-----|------|
| 1   | C <sub>12</sub> H <sub>18</sub> O <sub>2</sub> | 195.1380 | 4.0 | -4.4 |

Elements from ~ to C<sub>12</sub>H<sub>18</sub>O<sub>2</sub>

Mass tolerance 5 ppm

**Figure S32.** HRESIMS of **3**.

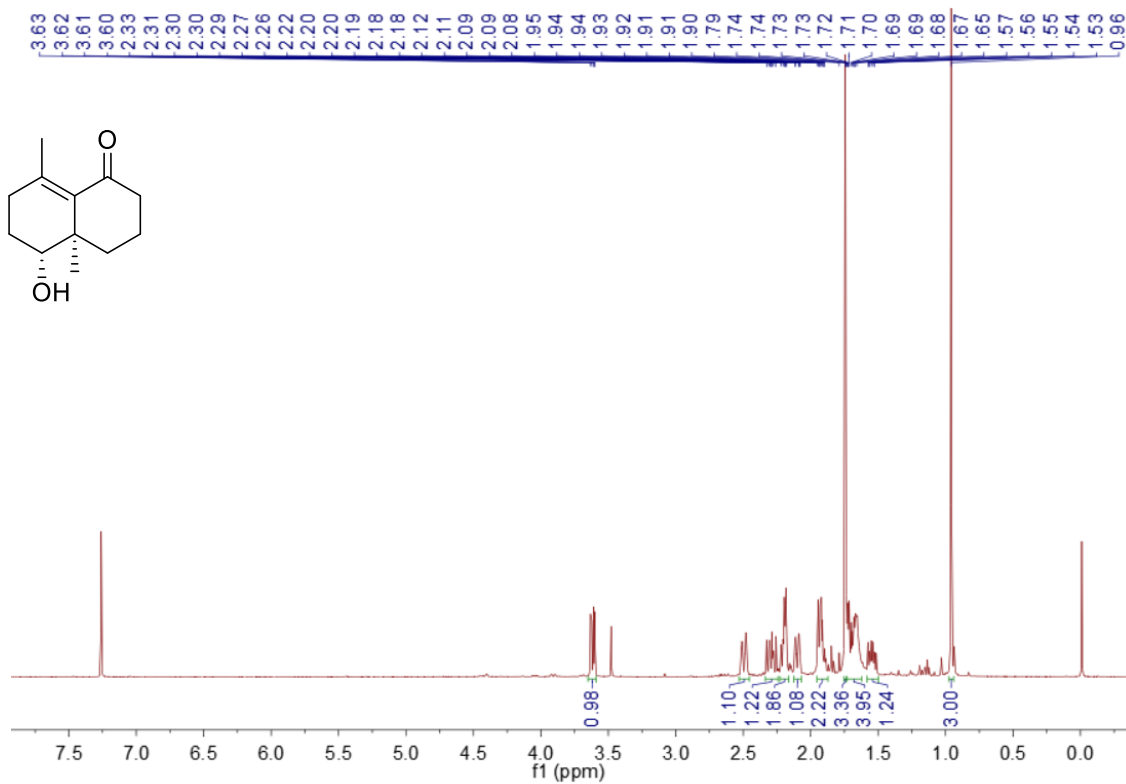

**Figure S33.** <sup>1</sup>H NMR spectrum of **4** in CDCl<sub>3</sub>.

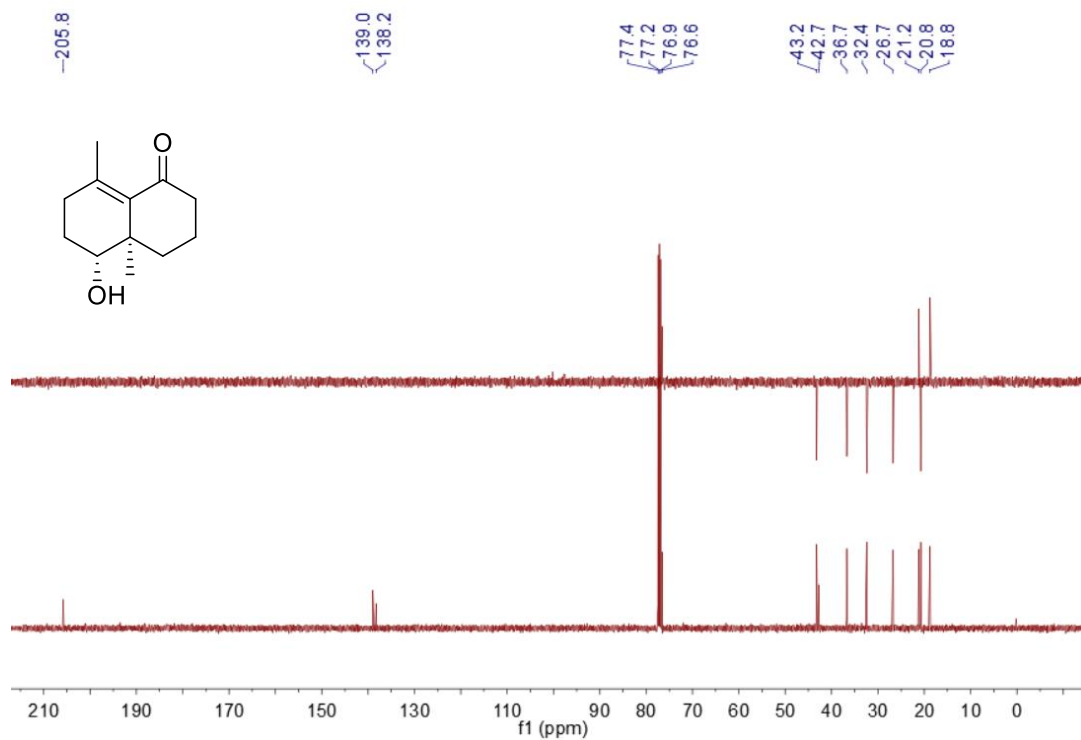

**Figure S34.** <sup>13</sup>C NMR and DEPT spectra of **4** in CDCl<sub>3</sub>.

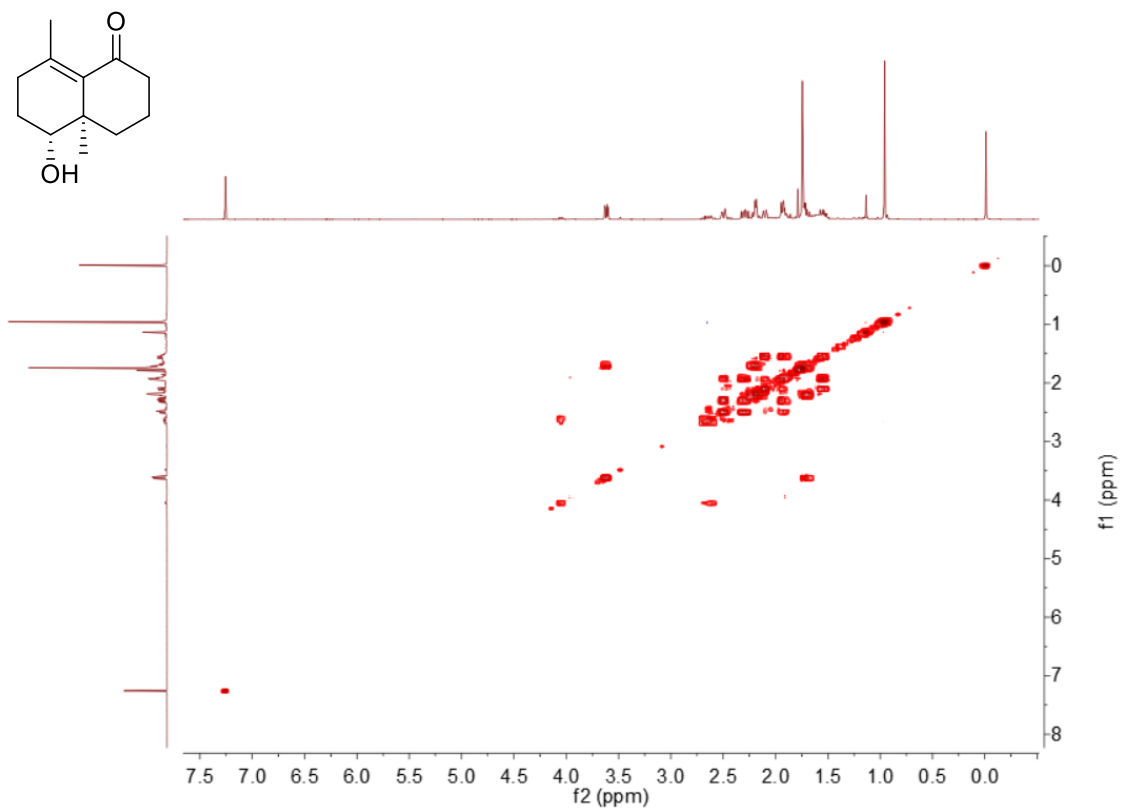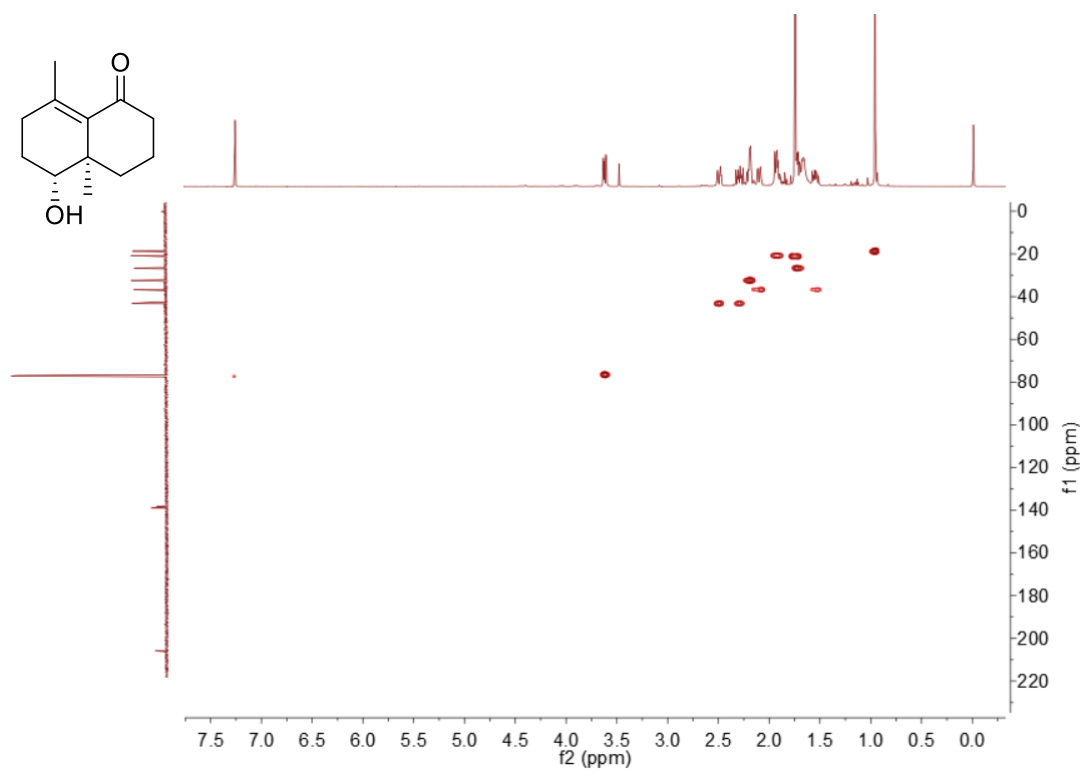

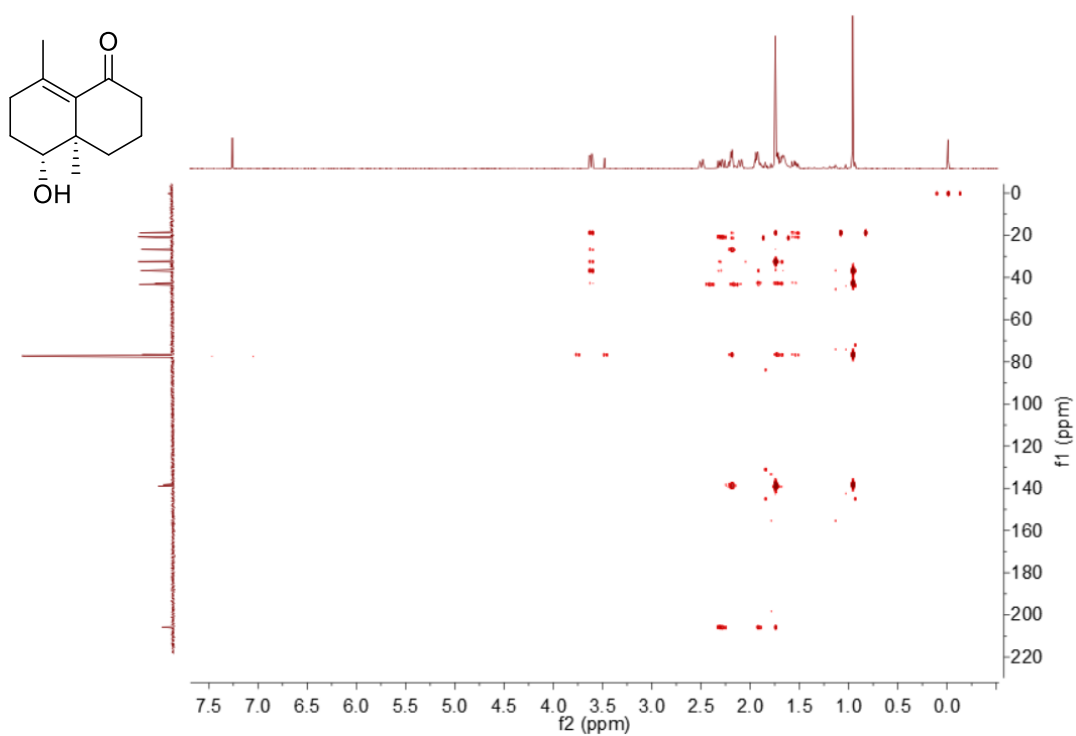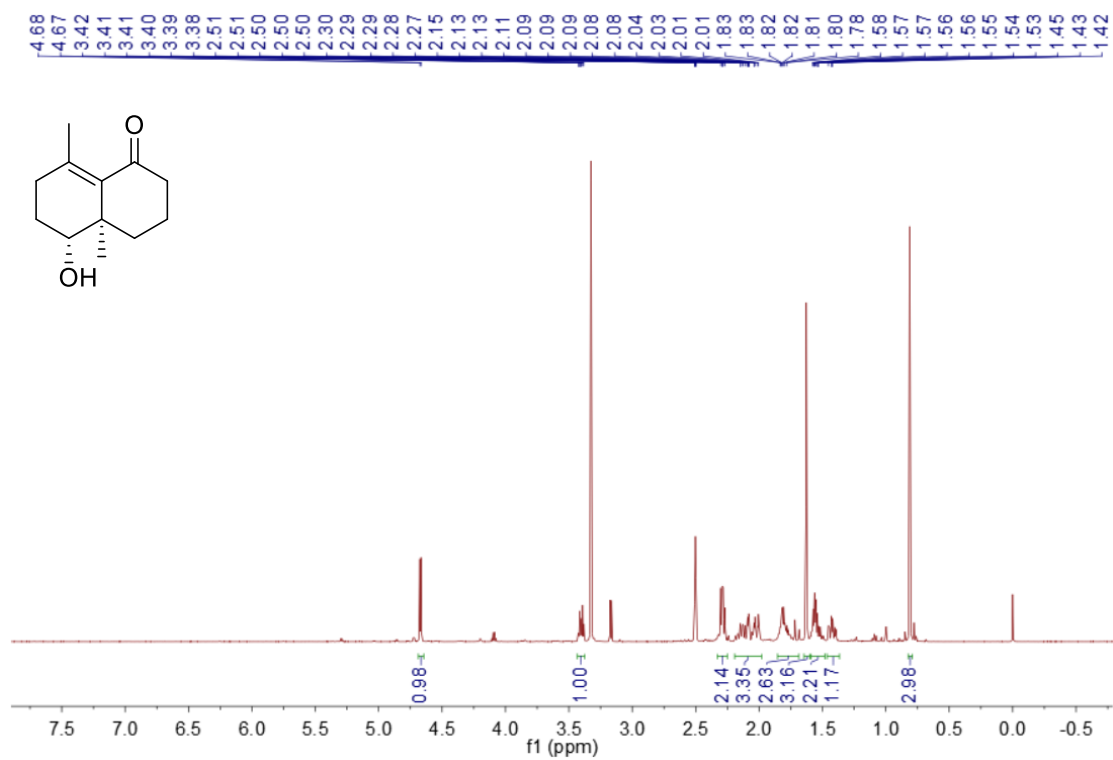

Figure S38. <sup>1</sup>H NMR spectrum of 4 in DMSO-*d*<sub>6</sub>.

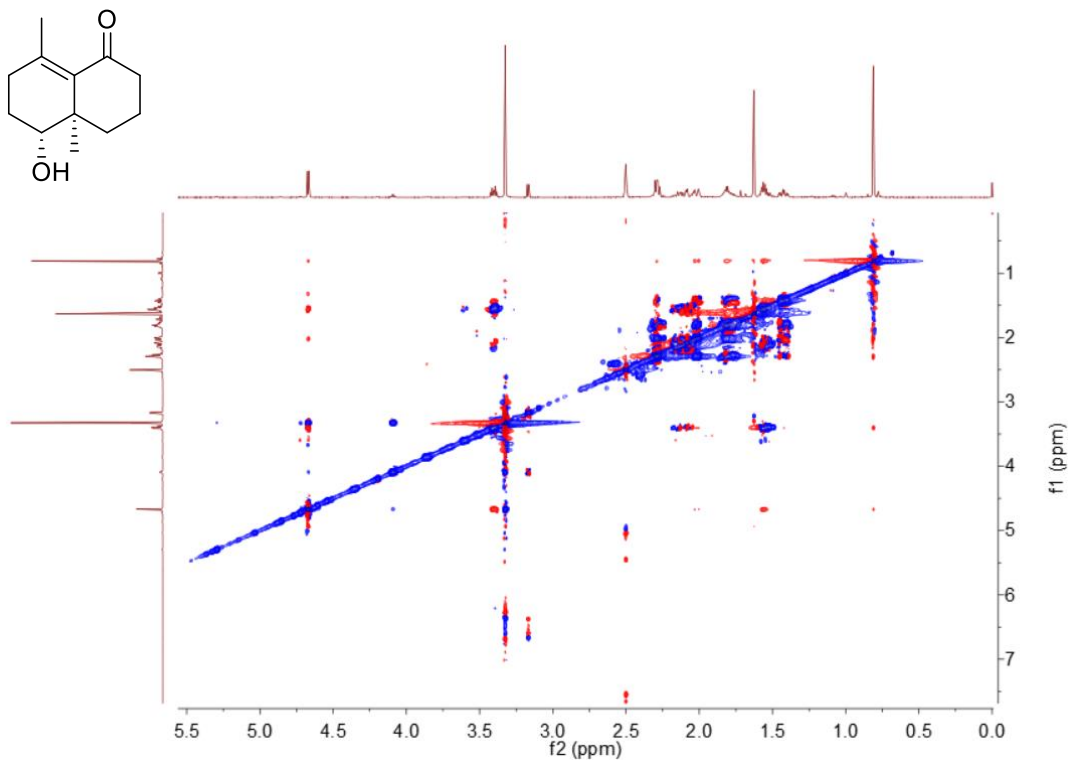

**Figure S39.** ROESY spectrum of **4** in DMSO-*d*<sub>6</sub>.

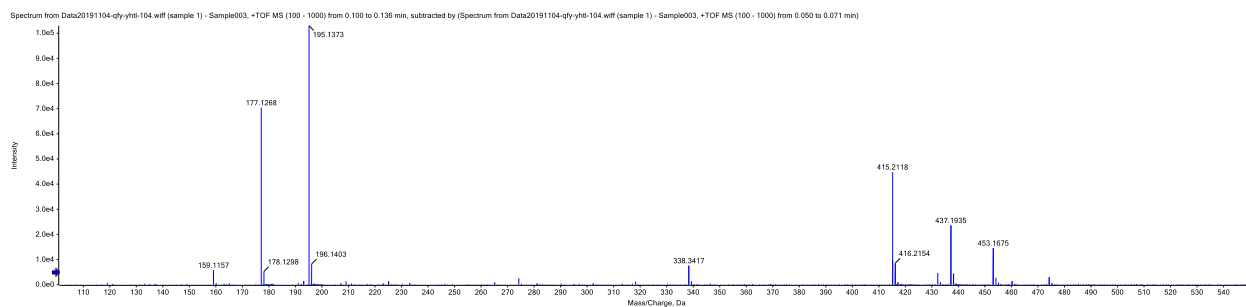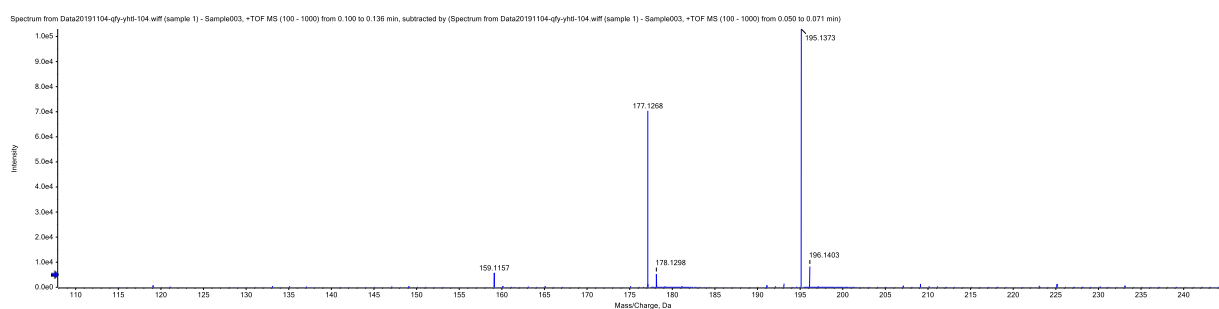

$[M+H]^+$  m/z 195.1373

| Hit | Formula                                        | m/z      | RDB | ppm  |
|-----|------------------------------------------------|----------|-----|------|
| 1   | C <sub>12</sub> H <sub>18</sub> O <sub>2</sub> | 195.1380 | 4.0 | -3.4 |

Elements from ~ to C<sub>12</sub>H<sub>18</sub>O<sub>2</sub>

Mass tolerance 5 ppm

**Figure S40.** HRESIMS of **4**.

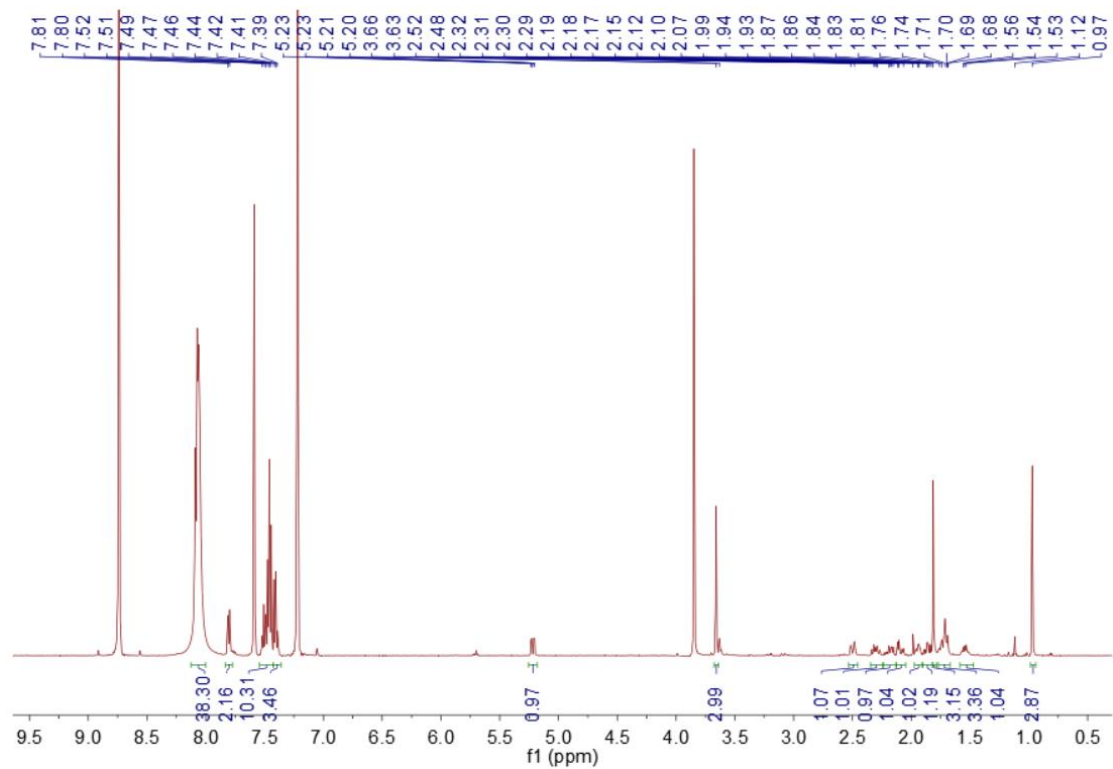

**Figure S41.**  $^1\text{H}$  NMR spectrum of **4a** in pyridine.

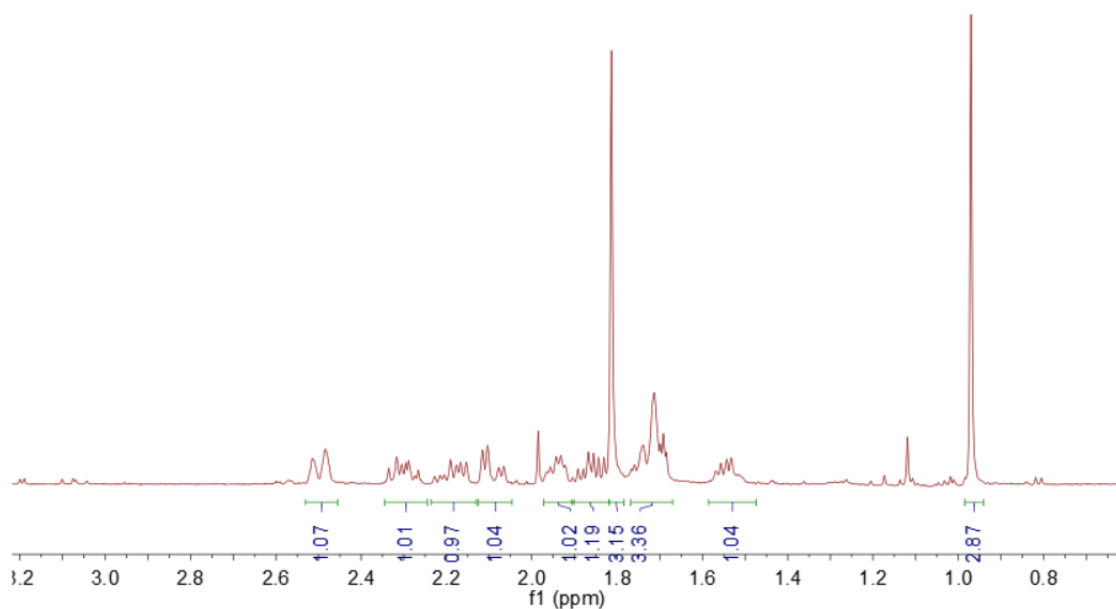

**Figure S42.** Enlarged  $^1\text{H}$  NMR spectrum of **4a** in pyridine.

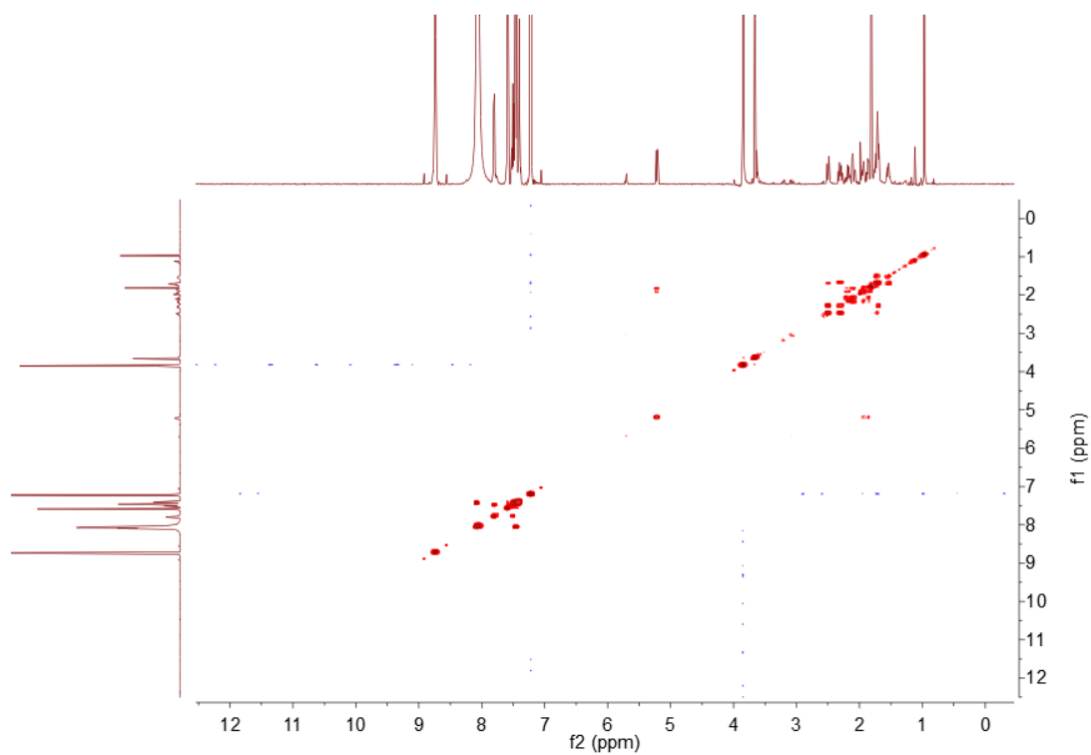

**Figure S43.**  $^1\text{H}$ - $^1\text{H}$  COSY spectrum of **4a** in pyridine.

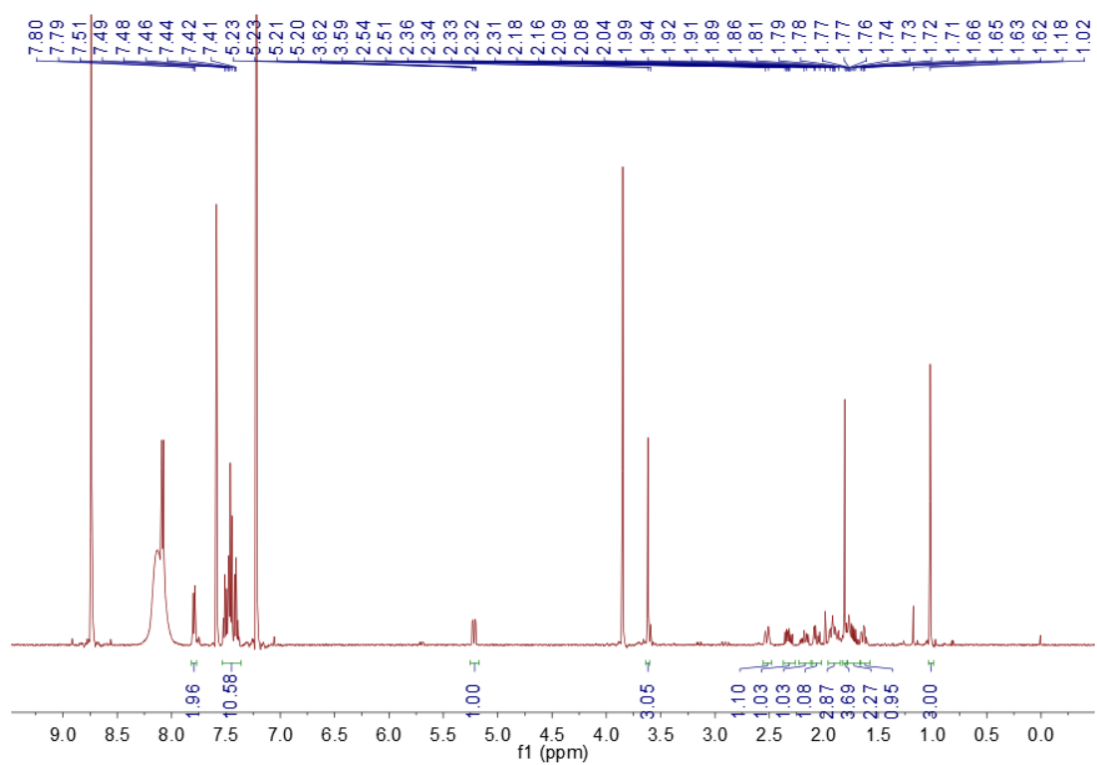

**Figure S44.**  $^1\text{H}$  NMR spectrum of **4b** in pyridine.



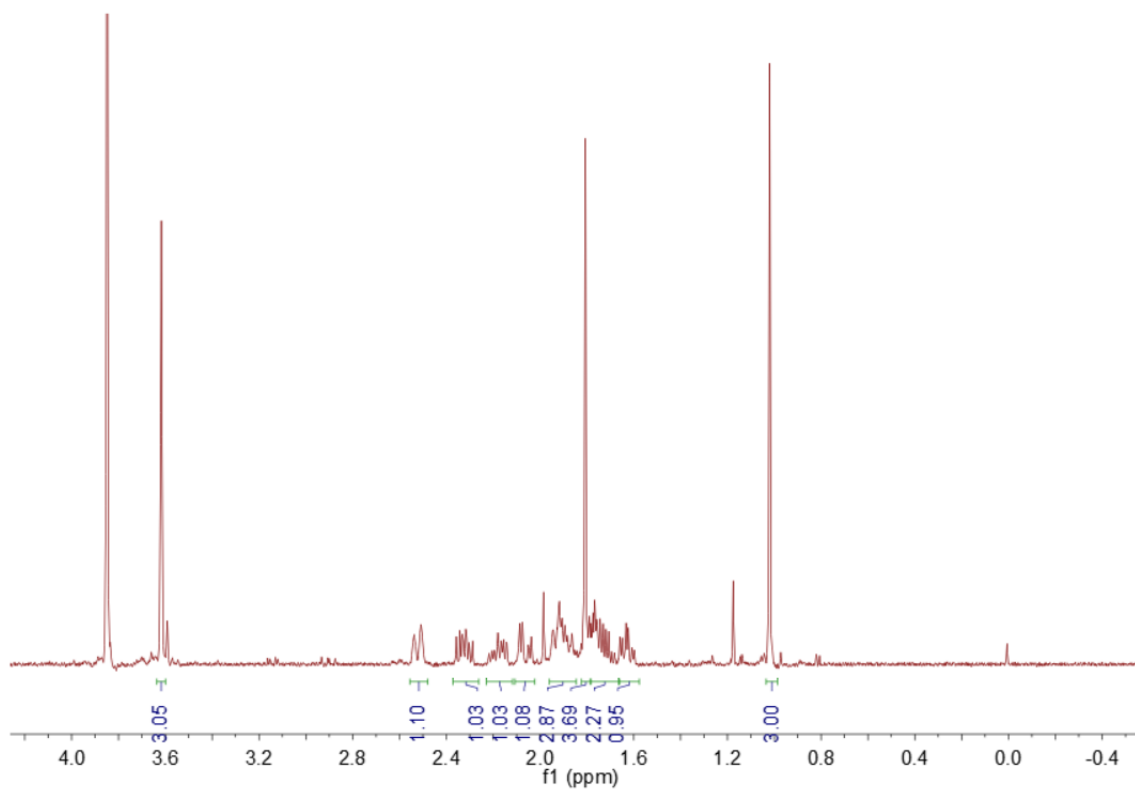

**Figure S45.** Enlarged  $^1\text{H}$  NMR spectrum of **4b** in pyridine.

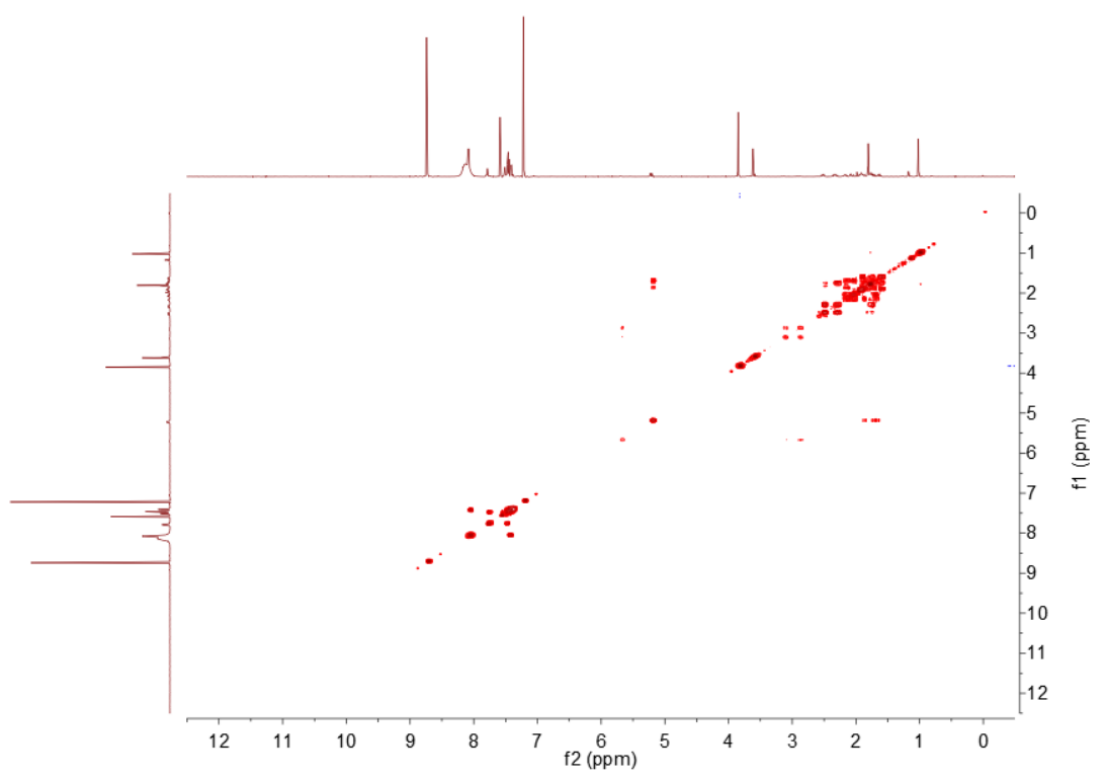

**Figure S46.**  $^1\text{H}$ - $^1\text{H}$  COSY spectrum of **4b** in pyridine.

### ECD calculation for compounds 1–4

Conformation search using molecular mechanics calculations was performed in CONFLEX version 7.0 with MMFF force field with an energy window for acceptable conformers (ewindow) of 5 kcal/mol above the ground state, a maximum number of conformations per molecule (maxconfs) of 100, and an RMSD cutoff (rmsd) of 0.5 Å. Then the predominant conformers were optimized at B3LYP/6-311+G(d) level in Gaussian 09 (Frisch et al. 2009)<sup>[1]</sup>. The optimized conformation geometries and thermodynamic parameters of all selected conformations were provided. The optimized conformers of 1–4 were used for the ECD calculation, which were performed with Gaussian 09 (B3LYP/6-311+G(d)). The solvent effects were taken into account by the polarizable-conductor calculation model (PCM, methanol as the solvent). Percentages for each conformation are shown in Table S1.

#### Selected conformation of 1 and their percentage

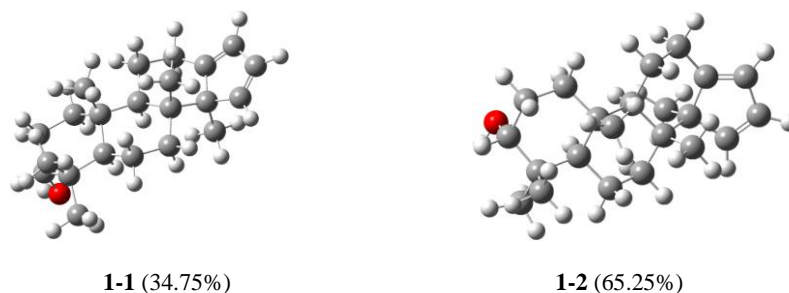

**Figure S47.** The lowest energy conformers of 1 (the relative populations are in parentheses).

#### Selected conformation of 2 and their percentage

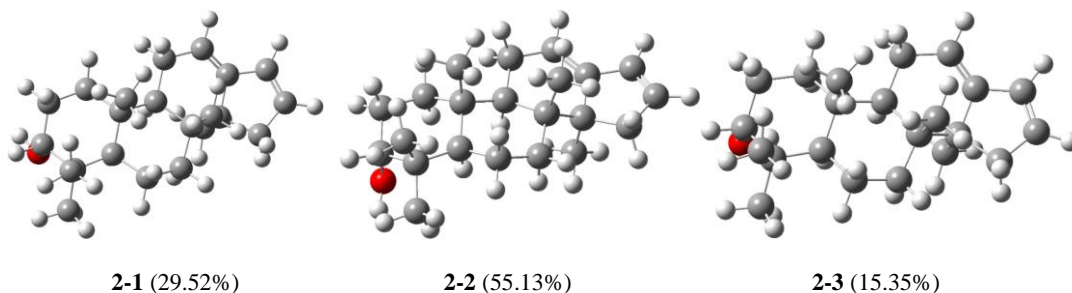

**Figure S48.** The lowest energy conformers of 2 (the relative populations are in parentheses).

#### Selected conformation of 3 and their percentage

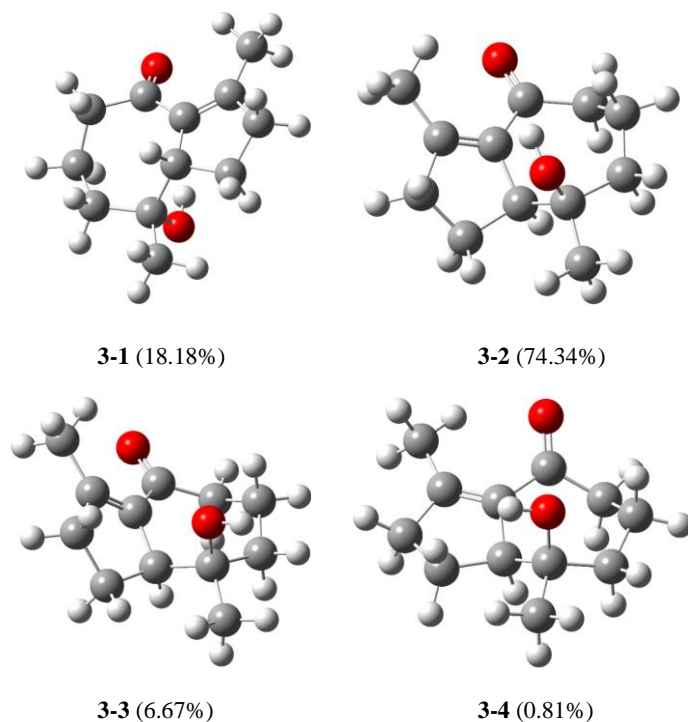

**Figure S49.** The lowest energy conformers of **3** (the relative populations are in parentheses).

#### Selected conformation of **4** and their percentage

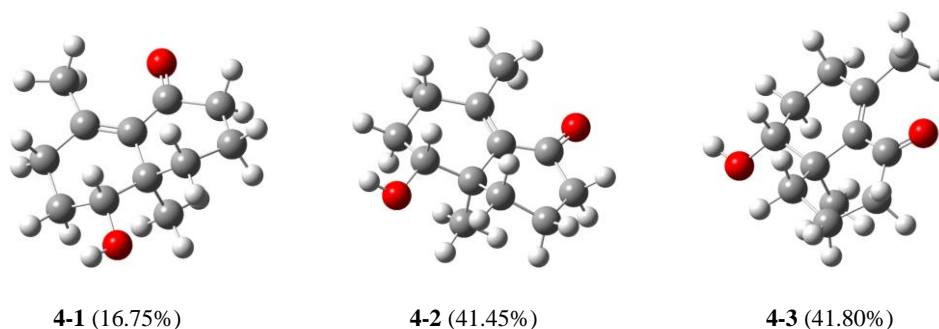

**Figure S50.** The lowest energy conformers of **4** (the relative populations are in parentheses).

**Table S1.** Extracted heats and weighting factors of the optimized conformers of **1–4** at B3LYP/6-31+G(d) level

|          |           | B3LYP/6-31+G(d) |                                       |
|----------|-----------|-----------------|---------------------------------------|
|          | Conformer | Extracted heats | Boltzmann-calculated contribution (%) |
| <b>1</b> | 1         | -934.10609970   | 34.75%                                |
|          | 2         | -934.10669391   | 65.25%                                |
| <b>2</b> | 1         | -934.09046291   | 29.52%                                |
|          | 2         | -934.09105204   | 55.13%                                |
|          | 3         | -934.08984497   | 15.35%                                |
| <b>3</b> | 1         | -618.61657993   | 18.18%                                |
|          | 2         | -618.61790882   | 74.34%                                |
|          | 3         | -618.61563400   | 6.67%                                 |
|          | 4         | -618.61363635   | 0.81%                                 |
| <b>4</b> | 1         | -618.61160223   | 16.75%                                |

|  |   |               |        |
|--|---|---------------|--------|
|  | 2 | -618.61245730 | 41.45% |
|  | 3 | -618.61246485 | 41.80% |

**Table S2.** The Cartesian coordinates of the lowest energy conformers for 1–4

| <b>1-1</b> | X axis(Å) | Y axis(Å) | Z axis(Å) | <b>1-2</b> | X axis(Å) | Y axis(Å) | Z axis(Å) |
|------------|-----------|-----------|-----------|------------|-----------|-----------|-----------|
| C          | 1.2902    | 2.0117    | 0.3404    | C          | 1.2942    | 2.0149    | 0.3221    |
| C          | 0.5038    | 0.7197    | -0.0285   | C          | 0.5054    | 0.7211    | -0.0354   |
| C          | 1.3715    | -0.5876   | 0.2343    | C          | 1.3707    | -0.5853   | 0.239     |
| C          | 2.7259    | -0.4698   | -0.6043   | C          | 2.7254    | -0.4774   | -0.6002   |
| C          | 3.4014    | 0.8487    | -0.2606   | C          | 3.4034    | 0.8426    | -0.268    |
| C          | 2.6394    | 2.1178    | -0.3817   | C          | 2.6437    | 2.1121    | -0.4007   |
| C          | 3.8264    | -1.4463   | -0.2149   | C          | 3.824     | -1.4527   | -0.202    |
| C          | 4.9054    | -0.7789   | 0.2226    | C          | 4.9041    | -0.7835   | 0.23      |
| C          | 4.6432    | 0.6365    | 0.2002    | C          | 4.6446    | 0.6322    | 0.1951    |
| C          | 2.5556    | -0.5734   | -2.1369   | C          | 2.5553    | -0.5943   | -2.1318   |
| C          | 1.7189    | -0.7591   | 1.7445    | C          | 1.7172    | -0.7443   | 1.7508    |
| C          | -0.9983   | 0.678     | 0.502     | C          | -0.9968   | 0.6869    | 0.4955    |
| C          | -1.7754   | 1.9017    | -0.0774   | C          | -1.7708   | 1.907     | -0.0945   |
| C          | -3.297    | 1.8251    | 0.092     | C          | -3.2928   | 1.834     | 0.0729    |
| C          | -3.8854   | 0.5396    | -0.4839   | C          | -3.8851   | 0.5454    | -0.4914   |
| C          | -3.2181   | -0.7506   | 0.0766    | C          | -3.2203   | -0.7413   | 0.0832    |
| C          | -1.6564   | -0.632    | -0.08     | C          | -1.658    | -0.6267   | -0.0749   |
| C          | -0.8678   | -1.8902   | 0.3376    | C          | -0.8712   | -1.8826   | 0.3535    |
| C          | 0.5663    | -1.84     | -0.1985   | C          | 0.5629    | -1.8396   | -0.1831   |
| O          | -3.7314   | 0.584     | -1.9069   | O          | -3.728    | 0.6112    | -1.9128   |
| C          | -1.064    | 0.7777    | 2.0453    | C          | -1.062    | 0.8006    | 2.0379    |
| C          | -3.6815   | -0.9958   | 1.5259    | C          | -3.6836   | -0.9649   | 1.5366    |
| C          | -3.7399   | -1.9575   | -0.7518   | C          | -3.7408   | -1.9636   | -0.7222   |
| H          | -1.5058   | -0.5631   | -1.1705   | H          | -1.5085   | -0.5676   | -1.1661   |
| H          | 0.3843    | 0.7767    | -1.1197   | H          | 0.3861    | 0.7685    | -1.1271   |
| H          | 1.466     | 2.0672    | 1.4193    | H          | 0.7169    | 2.9045    | 0.0515    |
| H          | 0.7112    | 2.9026    | 0.0779    | H          | 1.47      | 2.0798    | 1.4004    |
| H          | 3.2088    | 2.9592    | 0.0294    | H          | 3.2146    | 2.9561    | 0.0029    |
| H          | 2.4699    | 2.3374    | -1.4423   | H          | 2.4748    | 2.3225    | -1.4634   |
| H          | 3.7469    | -2.5204   | -0.2966   | H          | 3.7426    | -2.5273   | -0.2742   |
| H          | 5.8324    | -1.2173   | 0.5594    | H          | 5.8303    | -1.2204   | 0.571     |
| H          | 5.3375    | 1.3868    | 0.5465    | H          | 5.34      | 1.3844    | 0.5348    |
| H          | 1.7888    | 0.102     | -2.5255   | H          | 1.7899    | 0.0792    | -2.5267   |
| H          | 3.4863    | -0.3199   | -2.6622   | H          | 3.4866    | -0.3473   | -2.6592   |
| H          | 2.2962    | -1.5916   | -2.4475   | H          | 2.294     | -1.6147   | -2.4335   |
| H          | 2.2554    | 0.1006    | 2.1551    | H          | 2.2553    | 0.1178    | 2.154     |
| H          | 0.8426    | -0.9212   | 2.3688    | H          | 0.8404    | -0.8992   | 2.3762    |
| H          | 2.3454    | -1.6427   | 1.9109    | H          | 2.3419    | -1.6278   | 1.9251    |

|            |           |           |           |            |           |           |           |
|------------|-----------|-----------|-----------|------------|-----------|-----------|-----------|
| H          | -1.4345   | 2.8295    | 0.3974    | H          | -1.4293   | 2.838     | 0.3736    |
| H          | -1.5529   | 2.0046    | -1.1476   | H          | -1.546    | 2.0016    | -1.165    |
| H          | -3.7343   | 2.6895    | -0.4239   | H          | -3.7276   | 2.6927    | -0.455    |
| H          | -3.5752   | 1.9288    | 1.1449    | H          | -3.5727   | 1.9507    | 1.1241    |
| H          | -4.9641   | 0.5153    | -0.286    | H          | -4.9638   | 0.5393    | -0.2912   |
| H          | -0.8719   | -2.0326   | 1.4212    | H          | -0.8757   | -2.0157   | 1.4382    |
| H          | -1.3283   | -2.7898   | -0.0827   | H          | -1.3328   | -2.7852   | -0.0592   |
| H          | 1.0928    | -2.7539   | 0.1037    | H          | 1.0878    | -2.752    | 0.1267    |
| H          | 0.49      | -1.8826   | -1.2903   | H          | 0.4865    | -1.8912   | -1.2746   |
| H          | -4.2166   | 1.362     | -2.2307   | H          | -4.3446   | -0.0272   | -2.309    |
| H          | -0.2239   | 1.3375    | 2.4626    | H          | -0.2194   | 1.3602    | 2.4504    |
| H          | -1.9517   | 1.3099    | 2.3962    | H          | -1.9472   | 1.3403    | 2.3838    |
| H          | -1.086    | -0.1964   | 2.5358    | H          | -1.0883   | -0.1691   | 2.537     |
| H          | -3.1721   | -1.8559   | 1.9721    | H          | -3.1734   | -1.8176   | 1.996     |
| H          | -4.7571   | -1.21     | 1.5548    | H          | -4.7591   | -1.1795   | 1.5683    |
| H          | -3.5287   | -0.1369   | 2.1789    | H          | -3.5321   | -0.0964   | 2.1768    |
| H          | -4.8329   | -1.9296   | -0.8371   | H          | -4.833    | -1.9335   | -0.8161   |
| H          | -3.3286   | -1.9632   | -1.7671   | H          | -3.3203   | -1.9945   | -1.7331   |
| H          | -3.485    | -2.9141   | -0.2836   | H          | -3.4937   | -2.9107   | -0.231    |
| <b>2-1</b> | X axis(Å) | Y axis(Å) | Z axis(Å) | <b>2-2</b> | X axis(Å) | Y axis(Å) | Z axis(Å) |
| C          | 1.2388    | 2.0594    | 0.1874    | C          | 1.2424    | 2.0618    | 0.1652    |
| C          | 0.4778    | 0.7162    | -0.044    | C          | 0.4793    | 0.7173    | -0.0524   |
| C          | 1.3462    | -0.5571   | 0.3316    | C          | 1.3455    | -0.5535   | 0.3359    |
| C          | 2.7022    | -0.4709   | -0.5053   | C          | 2.7021    | -0.4777   | -0.5009   |
| C          | 3.3866    | 0.8539    | -0.2025   | C          | 3.3887    | 0.8484    | -0.21     |
| C          | 2.7389    | 1.9932    | 0.0654    | C          | 2.7426    | 1.9914    | 0.0459    |
| C          | 3.8118    | -1.5096   | -0.1718   | C          | 3.8097    | -1.5153   | -0.1571   |
| C          | 5.0653    | -0.6808   | -0.1126   | C          | 5.0646    | -0.6884   | -0.1042   |
| C          | 4.8026    | 0.63      | -0.1028   | C          | 4.8042    | 0.623     | -0.1068   |
| C          | 2.5036    | -0.5256   | -2.0528   | C          | 2.5042    | -0.5465   | -2.0479   |
| C          | 1.6598    | -0.5951   | 1.857     | C          | 1.6582    | -0.5775   | 1.8618    |
| C          | -1.0305   | 0.7091    | 0.4583    | C          | -1.0289   | 0.7179    | 0.4503    |
| C          | -1.7866   | 1.8932    | -0.2175   | C          | -1.7824   | 1.8969    | -0.2363   |
| C          | -3.3109   | 1.8302    | -0.0728   | C          | -3.307    | 1.837     | -0.0928   |
| C          | -3.8896   | 0.5086    | -0.5759   | C          | -3.8897   | 0.5127    | -0.583    |
| C          | -3.2381   | -0.7442   | 0.0821    | C          | -3.2401   | -0.7353   | 0.0889    |
| C          | -1.6728   | -0.6392   | -0.0478   | C          | -1.6744   | -0.6338   | -0.0427   |
| C          | -0.8909   | -1.864    | 0.4757    | C          | -0.894    | -1.855    | 0.4919    |
| C          | 0.562     | -1.8471   | -0.0162   | C          | 0.559     | -1.8452   | 0         |
| O          | -3.705    | 0.4587    | -1.995    | O          | -3.7032   | 0.484     | -2.002    |
| C          | -1.1306   | 0.9013    | 1.9925    | C          | -1.1279   | 0.9252    | 1.9826    |
| C          | -3.7434   | -2.0028   | -0.6761   | C          | -3.7445   | -2.0081   | -0.6446   |
| C          | -3.7353   | -0.8916   | 1.5334    | C          | -3.7367   | -0.8605   | 1.5431    |

|            |           |           |           |            |           |           |           |
|------------|-----------|-----------|-----------|------------|-----------|-----------|-----------|
| H          | -1.4977   | -0.6476   | -1.1367   | H          | -1.5006   | -0.6529   | -1.1317   |
| H          | 0.3636    | 0.6675    | -1.1354   | H          | 0.3648    | 0.6577    | -1.1432   |
| H          | 0.8753    | 2.8055    | -0.5297   | H          | 0.8812    | 2.8006    | -0.5606   |
| H          | 1.0236    | 2.4602    | 1.1818    | H          | 1.0266    | 2.4738    | 1.1548    |
| H          | 3.2931    | 2.8954    | 0.31      | H          | 3.2978    | 2.8953    | 0.282     |
| H          | 3.9004    | -2.2792   | -0.947    | H          | 3.8975    | -2.292    | -0.9253   |
| H          | 3.6777    | -2.0295   | 0.7777    | H          | 3.6737    | -2.0265   | 0.7969    |
| H          | 6.0547    | -1.1072   | -0.0249   | H          | 6.0532    | -1.1155   | -0.0116   |
| H          | 5.5376    | 1.415     | -0.0005   | H          | 5.5404    | 1.4078    | -0.0111   |
| H          | 1.859     | 0.2696    | -2.436    | H          | 1.8615    | 0.2464    | -2.4389   |
| H          | 3.4594    | -0.4119   | -2.5819   | H          | 3.4605    | -0.4397   | -2.5775   |
| H          | 2.0925    | -1.4863   | -2.3761   | H          | 2.0913    | -1.5094   | -2.3624   |
| H          | 2.1457    | 0.317     | 2.2138    | H          | 2.1445    | 0.3377    | 2.2104    |
| H          | 0.769     | -0.7416   | 2.4659    | H          | 0.7671    | -0.7179   | 2.4716    |
| H          | 2.3073    | -1.434    | 2.1235    | H          | 2.3051    | -1.4142   | 2.1366    |
| H          | -1.4404   | 2.8489    | 0.1957    | H          | -1.4355   | 2.8557    | 0.1689    |
| H          | -1.5458   | 1.9197    | -1.2885   | H          | -1.54     | 1.9141    | -1.3071   |
| H          | -3.7362   | 2.6589    | -0.6531   | H          | -3.7302   | 2.6588    | -0.6849   |
| H          | -3.6097   | 2.0023    | 0.9653    | H          | -3.6068   | 2.0225    | 0.9428    |
| H          | -4.9724   | 0.4985    | -0.4003   | H          | -4.9724   | 0.5205    | -0.4054   |
| H          | -0.9267   | -1.9342   | 1.5657    | H          | -0.9301   | -1.915    | 1.5825    |
| H          | -1.3381   | -2.7912   | 0.1034    | H          | -1.3421   | -2.7851   | 0.1281    |
| H          | 1.0856    | -2.7261   | 0.3801    | H          | 1.0811    | -2.7214   | 0.4045    |
| H          | 0.5203    | -1.9877   | -1.1008   | H          | 0.5172    | -1.9956   | -1.0832   |
| H          | -4.1778   | 1.2163    | -2.38     | H          | -4.3121   | -0.1793   | -2.368    |
| H          | -0.2756   | 1.4395    | 2.407     | H          | -0.2706   | 1.4639    | 2.3918    |
| H          | -2.0018   | 1.492     | 2.2872    | H          | -1.9966   | 1.5227    | 2.2715    |
| H          | -1.2084   | -0.0419   | 2.5359    | H          | -1.2095   | -0.0123   | 2.5351    |
| H          | -3.4967   | -2.9264   | -0.1419   | H          | -3.5057   | -2.9206   | -0.0879   |
| H          | -4.8345   | -1.9822   | -0.784    | H          | -4.8346   | -1.9861   | -0.761    |
| H          | -3.3126   | -2.0738   | -1.6807   | H          | -3.3047   | -2.1045   | -1.6431   |
| H          | -3.5945   | 0.0092    | 2.1306    | H          | -3.5964   | 0.0492    | 2.1267    |
| H          | -4.8119   | -1.1014   | 1.5518    | H          | -4.8133   | -1.0704   | 1.5649    |
| H          | -3.2391   | -1.721    | 2.0474    | H          | -3.2399   | -1.6816   | 2.0697    |
| <b>2-3</b> | X axis(Å) | Y axis(Å) | Z axis(Å) | <b>3-1</b> | X axis(Å) | Y axis(Å) | Z axis(Å) |
| C          | 1.2435    | 2.061     | 0.1775    | C          | 2.4514    | -1.9487   | -0.0993   |
| C          | 0.4814    | 0.7172    | -0.048    | C          | 1.5853    | -0.6917   | 0.1238    |
| C          | 1.3487    | -0.5548   | 0.3354    | C          | 0.192     | -0.8872   | -0.5437   |
| C          | 2.7052    | -0.4755   | -0.5019   | C          | 2.3804    | 0.5066    | -0.4514   |
| C          | 3.3894    | 0.8517    | -0.2109   | O          | 1.4704    | -0.5525   | 1.5418    |
| C          | 2.7427    | 1.993     | 0.0508    | C          | 1.8271    | 1.9117    | -0.2079   |
| C          | 3.8151    | -1.5111   | -0.1597   | C          | 0.4851    | 2.1581    | -0.8749   |
| C          | 5.0686    | -0.6819   | -0.1115   | C          | -0.6089   | 1.5534    | -0.0401   |

|   |         |         |         |   |         |         |         |
|---|---------|---------|---------|---|---------|---------|---------|
| C | 4.8058  | 0.629   | -0.1125 | O | -1.1997 | 2.2049  | 0.8173  |
| C | 2.5065  | -0.5435 | -2.049  | C | -0.89   | 0.1166  | -0.2357 |
| C | 1.6622  | -0.5832 | 1.8609  | C | -2.1023 | -0.4521 | -0.1271 |
| C | -1.0283 | 0.7143  | 0.4515  | C | -0.5195 | -2.1905 | -0.1231 |
| C | -1.7805 | 1.8957  | -0.2325 | C | -3.4305 | 0.1743  | 0.1261  |
| C | -3.3051 | 1.8402  | -0.0911 | C | -2.0121 | -1.9348 | -0.3105 |
| C | -3.9028 | 0.514   | -0.5585 | H | 0.3307  | -0.9066 | -1.6344 |
| C | -3.2364 | -0.7413 | 0.0826  | H | 2.5628  | -2.1772 | -1.1644 |
| C | -1.6709 | -0.6363 | -0.0467 | H | 3.4514  | -1.8155 | 0.3308  |
| C | -0.8897 | -1.8581 | 0.4866  | H | 2.0318  | -2.8249 | 0.4066  |
| C | 0.5634  | -1.8461 | -0.0047 | H | 2.5218  | 0.3638  | -1.531  |
| O | -3.8329 | 0.4685  | -1.9873 | H | 3.385   | 0.4995  | -0.006  |
| C | -1.1315 | 0.9161  | 1.9843  | H | 0.8199  | 0.1397  | 1.7548  |
| C | -3.7423 | -1.9974 | -0.6781 | H | 2.549   | 2.6291  | -0.6179 |
| C | -3.7256 | -0.8953 | 1.5371  | H | 1.7705  | 2.1098  | 0.8693  |
| H | -1.4915 | -0.6552 | -1.1338 | H | 0.2895  | 3.2347  | -0.945  |
| H | 0.3689  | 0.6629  | -1.1393 | H | 0.4492  | 1.7661  | -1.897  |
| H | 0.8785  | 2.8052  | -0.5408 | H | -0.1875 | -3.0496 | -0.7161 |
| H | 1.0317  | 2.4646  | 1.1714  | H | -0.3239 | -2.4243 | 0.932   |
| H | 3.2983  | 2.8965  | 0.2881  | H | -3.8071 | -0.1213 | 1.1102  |
| H | 3.9019  | -2.2889 | -0.927  | H | -3.4002 | 1.2659  | 0.0853  |
| H | 3.683   | -2.0207 | 0.7957  | H | -4.1503 | -0.1549 | -0.6307 |
| H | 6.0584  | -1.1072 | -0.022  | H | -2.5958 | -2.4848 | 0.4339  |
| H | 5.5412  | 1.4148  | -0.0184 | H | -2.349  | -2.2188 | -1.3131 |
| H | 1.8597  | 0.2468  | -2.4386 |   |         |         |         |
| H | 3.4618  | -0.4318 | -2.5793 |   |         |         |         |
| H | 2.0978  | -1.508  | -2.3642 |   |         |         |         |
| H | 2.1536  | 0.3287  | 2.2109  |   |         |         |         |
| H | 0.771   | -0.7199 | 2.4712  |   |         |         |         |
| H | 2.3048  | -1.424  | 2.1333  |   |         |         |         |
| H | -1.4332 | 2.8523  | 0.1779  |   |         |         |         |
| H | -1.5339 | 1.9203  | -1.3018 |   |         |         |         |
| H | -3.7278 | 2.6585  | -0.688  |   |         |         |         |
| H | -3.5988 | 2.0353  | 0.9449  |   |         |         |         |
| H | -4.9736 | 0.5176  | -0.3207 |   |         |         |         |
| H | -0.925  | -1.9201 | 1.5771  |   |         |         |         |
| H | -1.3376 | -2.7877 | 0.1213  |   |         |         |         |
| H | 1.0859  | -2.723  | 0.3976  |   |         |         |         |
| H | 0.522   | -1.9937 | -1.0882 |   |         |         |         |
| H | -2.9004 | 0.48    | -2.2565 |   |         |         |         |
| H | -0.2816 | 1.4646  | 2.3958  |   |         |         |         |
| H | -2.0083 | 1.5009  | 2.2741  |   |         |         |         |
| H | -1.202  | -0.0236 | 2.5345  |   |         |         |         |

|            |           |           |           |            |           |           |           |
|------------|-----------|-----------|-----------|------------|-----------|-----------|-----------|
| H          | -3.4891   | -2.923    | -0.1508   |            |           |           |           |
| H          | -4.8341   | -1.9801   | -0.7788   |            |           |           |           |
| H          | -3.3175   | -2.0607   | -1.6858   |            |           |           |           |
| H          | -3.5896   | 0.0074    | 2.1329    |            |           |           |           |
| H          | -4.8006   | -1.1138   | 1.5606    |            |           |           |           |
| H          | -3.2216   | -1.7212   | 2.0487    |            |           |           |           |
| <b>3-2</b> | X axis(Å) | Y axis(Å) | Z axis(Å) | <b>3-3</b> | X axis(Å) | Y axis(Å) | Z axis(Å) |
| C          | 3.0304    | -0.6223   | -0.6757   | C          | 3.0288    | -0.5853   | -0.7243   |
| C          | 1.7425    | -0.1182   | 0.0052    | C          | 1.7451    | -0.0961   | -0.0255   |
| C          | 0.4964    | -0.5248   | -0.8339   | C          | 0.4905    | -0.536    | -0.8331   |
| C          | 1.9016    | 1.4068    | 0.1971    | C          | 1.8609    | 1.4347    | 0.145     |
| O          | 1.7194    | -0.7404   | 1.2952    | O          | 1.7188    | -0.6989   | 1.2734    |
| C          | 0.7284    | 2.1459    | 0.8434    | C          | 0.7043    | 2.1107    | 0.8844    |
| C          | -0.4028   | 2.4404    | -0.1334   | C          | -0.4752   | 2.4328    | -0.0235   |
| C          | -1.3346   | 1.2835    | -0.3995   | C          | -1.3491   | 1.2632    | -0.4068   |
| O          | -2.4895   | 1.4806    | -0.776    | O          | -2.4704   | 1.4494    | -0.8808   |
| C          | -0.826    | -0.0965   | -0.2556   | C          | -0.8315   | -0.1095   | -0.2548   |
| C          | -1.517    | -1.1109   | 0.289     | C          | -1.5187   | -1.1183   | 0.3037    |
| C          | 0.2693    | -2.0508   | -0.9231   | C          | 0.2815    | -2.0668   | -0.8823   |
| C          | -2.8476   | -1.0997   | 0.959     | C          | -2.8471   | -1.0999   | 0.9757    |
| C          | -0.7742   | -2.4006   | 0.1371    | C          | -0.7595   | -2.4008   | 0.1862    |
| H          | 0.6041    | -0.122    | -1.8495   | H          | 0.58      | -0.1578   | -1.8601   |
| H          | 3.1149    | -0.25     | -1.702    | H          | 3.0875    | -0.2221   | -1.7556   |
| H          | 3.9171    | -0.2952   | -0.1191   | H          | 3.9201    | -0.2368   | -0.1887   |
| H          | 3.0868    | -1.7147   | -0.6938   | H          | 3.1021    | -1.6768   | -0.7319   |
| H          | 2.1409    | 1.8807    | -0.7637   | H          | 2.0105    | 1.9134    | -0.8312   |
| H          | 2.769     | 1.5751    | 0.8508    | H          | 2.7656    | 1.6428    | 0.7334    |
| H          | 0.8802    | -0.5206   | 1.7346    | H          | 2.5229    | -0.433    | 1.7522    |
| H          | 1.1098    | 3.1118    | 1.1999    | H          | 1.0789    | 3.0638    | 1.2799    |
| H          | 0.3628    | 1.6154    | 1.7293    | H          | 0.3888    | 1.5202    | 1.7521    |
| H          | -1.0182   | 3.2385    | 0.3008    | H          | -1.1233   | 3.1404    | 0.5087    |
| H          | -0.0179   | 2.8036    | -1.0924   | H          | -0.1355   | 2.9206    | -0.944    |
| H          | -0.1357   | -2.2921   | -1.9163   | H          | -0.1186   | -2.3395   | -1.8692   |
| H          | 1.1708    | -2.656    | -0.8029   | H          | 1.1905    | -2.657    | -0.744    |
| H          | -2.7758   | -1.5754   | 1.9426    | H          | -2.7672   | -1.5336   | 1.9778    |
| H          | -3.2316   | -0.0884   | 1.1172    | H          | -3.2467   | -0.0887   | 1.0905    |
| H          | -3.5782   | -1.6532   | 0.3611    | H          | -3.5702   | -1.6882   | 0.4022    |
| H          | -0.3106   | -2.6932   | 1.0848    | H          | -0.2931   | -2.6621   | 1.1417    |
| H          | -1.419    | -3.2136   | -0.2105   | H          | -1.3932   | -3.2311   | -0.1402   |
| <b>3-4</b> | X axis(Å) | Y axis(Å) | Z axis(Å) | <b>4-1</b> | X axis(Å) | Y axis(Å) | Z axis(Å) |
| C          | 2.4379    | -1.9672   | -0.0124   | C          | -1.926    | -0.2466   | -0.3827   |
| C          | 1.5853    | -0.6929   | 0.1285    | C          | -0.53     | -0.7035   | 0.1437    |
| C          | 0.1933    | -0.8842   | -0.542    | C          | -2.31     | 1.1323    | 0.1459    |



|            |           |           |           |            |           |           |           |
|------------|-----------|-----------|-----------|------------|-----------|-----------|-----------|
| C          | 2.3841    | 0.4736    | -0.5028   | C          | 0.156     | 1.7236    | -0.1933   |
| O          | 1.4601    | -0.4216   | 1.5254    | C          | 0.4827    | 0.4291    | 0.0203    |
| C          | 1.8585    | 1.8878    | -0.2408   | C          | 2.3353    | -1.2026   | -0.6466   |
| C          | 0.4963    | 2.1566    | -0.854    | C          | -0.0788   | -1.922    | -0.7112   |
| C          | -0.5994   | 1.5551    | -0.0129   | C          | 1.3636    | -2.3551   | -0.4493   |
| O          | -1.2353   | 2.2295    | 0.7938    | C          | -0.6203   | -1.1232   | 1.6319    |
| C          | -0.8838   | 0.1155    | -0.2083   | O          | -2.9356   | -1.1907   | -0.0265   |
| C          | -2.0977   | -0.4542   | -0.1155   | C          | 1.9158    | 0.0043    | 0.1565    |
| C          | -0.5218   | -2.199    | -0.1639   | C          | -1.2844   | 2.1803    | -0.2726   |
| C          | -3.4273   | 0.1695    | 0.1393    | C          | 1.1492    | 2.8424    | -0.3899   |
| C          | -2.0137   | -1.9313   | -0.3397   | O          | 2.7071    | 0.6245    | 0.8617    |
| H          | 0.3325    | -0.8812   | -1.633    | H          | -1.9096   | -0.2021   | -1.48     |
| H          | 2.5584    | -2.2558   | -1.0616   | H          | -2.4089   | 1.1103    | 1.2378    |
| H          | 3.434     | -1.8203   | 0.4219    | H          | -3.3029   | 1.4175    | -0.2237   |
| H          | 2.0025    | -2.8088   | 0.5367    | H          | 3.3382    | -1.5092   | -0.33     |
| H          | 2.48      | 0.3145    | -1.5847   | H          | 2.3928    | -0.9095   | -1.7009   |
| H          | 3.4057    | 0.4548    | -0.0983   | H          | -0.7439   | -2.7766   | -0.5335   |
| H          | 0.8895    | -1.0928   | 1.9356    | H          | -0.1695   | -1.6776   | -1.7786   |
| H          | 2.5753    | 2.5945    | -0.6778   | H          | 1.4565    | -2.7512   | 0.5683    |
| H          | 1.8429    | 2.089     | 0.8371    | H          | 1.6277    | -3.1746   | -1.1277   |
| H          | 0.3168    | 3.2377    | -0.8997   | H          | -1.2865   | -1.9826   | 1.7659    |
| H          | 0.427     | 1.7884    | -1.8835   | H          | 0.3551    | -1.4066   | 2.0425    |
| H          | -0.1928   | -3.0371   | -0.788    | H          | -0.9968   | -0.3097   | 2.2611    |
| H          | -0.3308   | -2.4763   | 0.8803    | H          | -3.7835   | -0.8649   | -0.3747   |
| H          | -3.8073   | -0.1375   | 1.1186    | H          | -1.4252   | 3.0706    | 0.3525    |
| H          | -3.3999   | 1.2612    | 0.1099    | H          | -1.4893   | 2.4821    | -1.3078   |
| H          | -4.1442   | -0.1524   | -0.6234   | H          | 0.8305    | 3.4867    | -1.2171   |
| H          | -2.5981   | -2.4989   | 0.3908    | H          | 1.2118    | 3.4538    | 0.5157    |
| H          | -2.3543   | -2.1867   | -1.3487   | H          | 2.1523    | 2.494     | -0.6475   |
| <b>4-2</b> | X axis(Å) | Y axis(Å) | Z axis(Å) | <b>4-3</b> | X axis(Å) | Y axis(Å) | Z axis(Å) |
| C          | -1.9271   | -0.2502   | -0.3908   | C          | -1.9355   | -0.2263   | -0.3808   |
| C          | -0.5302   | -0.7067   | 0.1349    | C          | -0.541    | -0.6979   | 0.1417    |
| C          | -2.3155   | 1.1307    | 0.13      | C          | -2.2983   | 1.1596    | 0.1429    |
| C          | 0.1499    | 1.7248    | -0.1934   | C          | 0.1707    | 1.723     | -0.1978   |
| C          | 0.4778    | 0.4312    | 0.0228    | C          | 0.4825    | 0.4263    | 0.0225    |
| C          | 2.341     | -1.1841   | -0.6489   | C          | 2.3261    | -1.2103   | -0.6482   |
| C          | -0.0705   | -1.9151   | -0.7298   | C          | -0.0942   | -1.9148   | -0.7187   |
| C          | 1.3737    | -2.3435   | -0.4675   | C          | 1.3465    | -2.3574   | -0.4599   |
| C          | -0.618    | -1.1398   | 1.6191    | C          | -0.6361   | -1.1246   | 1.6271    |
| O          | -2.9499   | -1.1914   | -0.0649   | O          | -2.9805   | -1.1236   | -0.0059   |
| C          | 1.9108    | 0.01      | 0.1674    | C          | 1.9114    | -0.0091   | 0.1651    |
| C          | -1.2908   | 2.1779    | -0.2917   | C          | -1.2647   | 2.1936    | -0.2868   |
| C          | 1.1424    | 2.8459    | -0.381    | C          | 1.1754    | 2.8319    | -0.3922   |

|   |         |         |         |   |         |         |         |
|---|---------|---------|---------|---|---------|---------|---------|
| O | 2.6894  | 0.6191  | 0.8955  | O | 2.7014  | 0.5954  | 0.8845  |
| H | -1.9034 | -0.199  | -1.4874 | H | -1.9324 | -0.1807 | -1.4783 |
| H | -2.4131 | 1.1159  | 1.2223  | H | -2.3899 | 1.1451  | 1.2358  |
| H | -3.3093 | 1.4088  | -0.2424 | H | -3.291  | 1.4526  | -0.2214 |
| H | 3.3445  | -1.4887 | -0.3324 | H | 3.3269  | -1.5252 | -0.3335 |
| H | 2.4004  | -0.8784 | -1.6994 | H | 2.3858  | -0.9088 | -1.6999 |
| H | -0.7322 | -2.7742 | -0.5621 | H | -0.7595 | -2.7693 | -0.5439 |
| H | -0.1589 | -1.6613 | -1.7952 | H | -0.1854 | -1.6653 | -1.7848 |
| H | 1.4647  | -2.7496 | 0.5464  | H | 1.4364  | -2.7612 | 0.5551  |
| H | 1.6443  | -3.1546 | -1.1534 | H | 1.6058  | -3.1739 | -1.1437 |
| H | -1.2625 | -2.0171 | 1.7426  | H | -1.3102 | -1.9787 | 1.7552  |
| H | 0.3615  | -1.4029 | 2.0336  | H | 0.3362  | -1.4189 | 2.0372  |
| H | -1.0187 | -0.3404 | 2.2515  | H | -1.0065 | -0.3111 | 2.26    |
| H | -3.1969 | -1.0666 | 0.8677  | H | -2.8602 | -1.9508 | -0.5019 |
| H | -1.4397 | 3.0741  | 0.323   | H | -1.3984 | 3.0922  | 0.3279  |
| H | -1.487  | 2.4684  | -1.3319 | H | -1.4644 | 2.4854  | -1.3259 |
| H | 2.152   | 2.5     | -0.6153 | H | 2.1788  | 2.4734  | -0.6342 |
| H | 0.8368  | 3.4816  | -1.2197 | H | 0.8717  | 3.4715  | -1.2285 |
| H | 1.1851  | 3.4653  | 0.5204  | H | 1.2323  | 3.4505  | 0.509   |

#### Reference

(1) M. J. Frisch, G. W. Trucks, H. B. Schlegel, G. E. Scuseria, M. A. Robb, J. R. Cheeseman, G. Scalmani, V. Barone, B. Mennucci, G. A. Petersson, H. Nakatsuji, M. Caricato, X. Li, H. P. Hratchian, A. F. Izmaylov, J. Bloino, G. Zheng, J. L. Sonnenberg, M. Hada, M. Ehara, K. Toyota, R. Fukuda, J. Hasegawa, M. Ishida, T. Nakajima, Y. Honda, O. Kitao, H. Nakai, T. Vreven, J. A. Montgomery, J. E. Peralta, F. Ogliaro, M. Bearpark, J. J. Heyd, E. Brothers, K. N. Kudin, V. N. Staroverov, R. Kobayashi, J. Normand, K. Raghavachari, A. Rendell, J. C. Burant, S. S. Iyengar, J. Tomasi, M. Cossi, N. Rega, J. M. Millam, M. Klene, J. E. Knox, J. B. Cross, V. Bakken, C. Adamo, J. Jaramillo, R. Gomperts, R. E. Stratmann, O. Yazyev, A. J. Austin, R. Cammi, C. Pomelli, J. W. Ochterski, R. L. Martin, K. Morokuma, V. G. Zakrzewski, G. A. Voth, P. Salvador, J. J. Dannenberg, S. Dapprich, A. D. Daniels, O. Farkas, J. B. Foresman, J. V. Ortiz, J. Cioslowski, D. J. Fox, Gaussian, Inc., Wallingford CT, 2009.
